# Supplementary material for: Can selenenyl sulfides be a substrate of glutathione reductase enzyme? A theoretical insight
Source: Royal Society of Chemistry journal article supplement (doi:10.1039/d4ra06738j), 2024-01-01
Supplement: d4ra06738j1.pdf [file d4ra06738j1.pdf]

# Can Selenenyl Sulfides be a Substrate of Glutathione Reductase Enzyme? A Theoretical Insight

Vishnu Rama Chari<sup>1,2</sup> and Raghu Nath Behera<sup>1,\*</sup>

<sup>1</sup>Department of Chemistry, Birla Institute of Technology and Science Pilani–K. K. Birla Goa Campus, Zuarinagar, Goa 403726 India

<sup>2</sup>School of Chemical Sciences, Goa University, Taleigao Plateau 403206, Goa, India.

\*Corresponding author: Raghu Nath Behera, rbehera@goa.bits-pilani.ac.in

## List of Figures

|    |                                                                                                                                                                                                                                                                                                                                                                                                                                                                           |   |
|----|---------------------------------------------------------------------------------------------------------------------------------------------------------------------------------------------------------------------------------------------------------------------------------------------------------------------------------------------------------------------------------------------------------------------------------------------------------------------------|---|
| S1 | Gas-phase optimized geometries at M06-2X/6-311++g(2df,2pd) level of theory of phenyl selenide based selenenyl sulfide ( <b>1b</b> ) and amine-based selenenyl sulfides <b>2b</b> to <b>5b</b> and <b>2'b</b> . The bond distance $r_{N...Se}$ in Å is given in parentheses and $\angle_{N...Se-S}$ in degrees is given in square brackets. Colour scheme: white – hydrogen, grey – carbon, blue – nitrogen, red – oxygen, yellow – sulfur and orange – selenium . . . . . | 2 |
| S2 | Gas-phase optimized geometries at M06-2X/6-311++g(2df,2pd) level of theory of ebselen-based (amide-based) selenenyl sulfide <b>6b</b> to <b>8b</b> , GSSG and GSH. The bond distance $r_{OSe}$ in Å is given in parentheses. Colour scheme: white – hydrogen, grey – carbon, blue – nitrogen, red – oxygen, yellow – sulfur and orange – selenium . . . . .                                                                                                               | 3 |
| S3 | Best pose structure obtained from molecular docking study for ( <b>1b</b> ) and amine-based selenenyl sulfides <b>2b</b> to <b>5b</b> and <b>2'b</b> with glutathione reductase enzyme (PDB: 2GH5). . . . .                                                                                                                                                                                                                                                               | 4 |
| S4 | Best pose structure obtained from molecular docking study for ebselen-based (amide-based) selenenyl sulfide <b>6b</b> to <b>8b</b> , and GSSG with glutathione reductase enzyme (PDB: 2GH5). . . . .                                                                                                                                                                                                                                                                      | 5 |

## List of Tables

|     |                                                                                                                                                                                                                                                                                                                                                                                           |    |
|-----|-------------------------------------------------------------------------------------------------------------------------------------------------------------------------------------------------------------------------------------------------------------------------------------------------------------------------------------------------------------------------------------------|----|
| S1  | Calculated redox potentials (in V) for GSSG 2GSH couple at pH = 7 using the studied functionals with 6-311++g(2df,2pd) basis set <sup>1;2;3;4</sup> . . . . .                                                                                                                                                                                                                             | 1  |
| S2  | Calculated redox potentials, $E_{rel, SHE}^o(A B)$ at pH = 7 in Volts, at M06-2X/6-311++g(2df,2pd) level of theory. Here A B is either RSeSG (RSeH + GSH) or GSSG 2GSH couple. . . . .                                                                                                                                                                                                    | 1  |
| S3  | Docking results of GSSG and RSeSG-type compounds with active site of GR (PDB ID: 2GH5). . . . .                                                                                                                                                                                                                                                                                           | 6  |
| S4  | Electronic energy in gas-phase ( $\epsilon_0, gas$ ), electronic energy in solvent ( $\epsilon_0, solv$ ), and thermal correction to free energy ( $G_{corr, gas}$ ) for the phenyl selenide-based RSeSG ( <b>1b</b> ), amine-based RSeSG ( <b>2b</b> - <b>5b</b> and <b>2'b</b> ), amide-based RSeSG ( <b>6b</b> - <b>8b</b> ) and GSSG. All energies are reported in Hartrees . . . . . | 7  |
| S5  | Coordinates of optimized geometry of GSSG and GSH in gas phase used for benchmark study using B3LYP at 6-311++g(2df,2pd) level of theory. . . . .                                                                                                                                                                                                                                         | 7  |
| S6  | Coordinates of optimized geometry of GSSG and GSH in gas phase used for benchmark study using wB97-XD at 6-311++g(2df,2pd) level of theory. . . . .                                                                                                                                                                                                                                       | 10 |
| S7  | Coordinates of optimized geometry of GSSG and GSH in gas phase used for benchmark study using M06-2X at 6-311++g(2df,2pd) level of theory. . . . .                                                                                                                                                                                                                                        | 13 |
| S8  | Coordinates of the optimized geometry of radical of <b>1b</b> at M062-X/6-311++g(2df,2pd) level of theory. . .                                                                                                                                                                                                                                                                            | 16 |
| S9  | Coordinates of the optimized geometry of radical of <b>2b</b> at M06-2X/6-311++g(2df,2pd) level of theory. . .                                                                                                                                                                                                                                                                            | 17 |
| S10 | Coordinates of the optimized geometry of radical of <b>3b</b> at M06-2X/6-311++g(2df,2pd) level of theory. . .                                                                                                                                                                                                                                                                            | 18 |
| S11 | Coordinates of the optimized geometry of radical of <b>4b</b> at M06-2X/6-311++g(2df,2pd) level of theory. . .                                                                                                                                                                                                                                                                            | 19 |
| S12 | Coordinates of the optimized geometry of radical of <b>5b</b> at M06-2X/6-311++g(2df,2pd) level of theory. . .                                                                                                                                                                                                                                                                            | 20 |
| S13 | Coordinates of the optimized geometry of radical of <b>6b</b> at M06-2X/6-311++g(2df,2pd) level of theory. . .                                                                                                                                                                                                                                                                            | 21 |
| S14 | Coordinates of the optimized geometry of radical of <b>7b</b> at M06-2X/6-311++g(2df,2pd) level of theory. . .                                                                                                                                                                                                                                                                            | 22 |
| S15 | Coordinates of the optimized geometry of radical of <b>8b</b> at M06-2X/6-311++g(2df,2pd) level of theory. . .                                                                                                                                                                                                                                                                            | 23 |

|     |                                                                                                                                                                        |    |
|-----|------------------------------------------------------------------------------------------------------------------------------------------------------------------------|----|
| S16 | Coordinates of the optimized geometry of radical of <b>9b</b> at M06-2X/6-311++g(2df,2pd) level of theory. . .                                                         | 24 |
| S17 | Coordinates of the optimized geometry of radical of GS at M06-2X/6-311++g(2df,2pd) level of theory. . .                                                                | 25 |
| S18 | Coordinates of the optimized geometry of selenenyl sulfide <b>1b</b> (RSeSG) and its corresponding selenol (RSeH) at M06-2X/6-311++g(2df,2pd) level of theory. . . . . | 26 |
| S19 | Coordinates of the optimized geometry of selenenyl sulfide <b>2b</b> (RSeSG) and its corresponding selenol (RSeH) at M06-2X/6-311++g(2df,2pd) level of theory. . . . . | 28 |
| S20 | Coordinates of the optimized geometry of selenenyl sulfide <b>3b</b> (RSeSG) and its corresponding selenol (RSeH) at M06-2X/6-311++g(2df,2pd) level of theory. . . . . | 30 |
| S21 | Coordinates of the optimized geometry of selenenyl sulfide <b>4b</b> (RSeSG) and its corresponding selenol (RSeH) at M06-2X/6-311++g(2df,2pd) level of theory. . . . . | 32 |
| S22 | Coordinates of the optimized geometry of selenenyl sulfide <b>5b</b> (RSeSG) and its corresponding selenol (RSeH) at M06-2X/6-311++g(2df,2pd) level of theory. . . . . | 34 |
| S23 | Coordinates of the optimized geometry of selenenyl sulfide <b>6b</b> (RSeSG) and its corresponding selenol (RSeH) at M06-2X/6-311++g(2df,2pd) level of theory. . . . . | 37 |
| S24 | Coordinates of the optimized geometry of selenenyl sulfide <b>7b</b> (RSeSG) and its corresponding selenol (RSeH) at M06-2X/6-311++g(2df,2pd) level of theory. . . . . | 39 |
| S25 | Coordinates of the optimized geometry of selenenyl sulfide <b>8b</b> (RSeSG) and its corresponding selenol (RSeH) at M06-2X/6-311++g(2df,2pd) level of theory. . . . . | 41 |
| S26 | Coordinates of the optimized geometry of selenenyl sulfide <b>9b</b> (RSeSG) and its corresponding selenol (RSeH) at M06-2X/6-311++g(2df,2pd) level of theory. . . . . | 43 |

# Justification for the methods used

## Functional

A benchmark study was conducted to obtain the standard redox potential of GSSG|2GSH couple which has a value of -0.240 Volts at pH = 7<sup>1;2</sup>. We have selected three popular functionals B3LYP,  $\omega$ B97X-D, and M06-2X with 6-311++g(2df,2pd) basis set for this purpose. The redox potential of GSSG|2GSH couple (Eq. 1c in the main text) was calculated from the reaction free energy in solution  $\Delta_r G_s^o(A|B)$ , where  $\sum_i A_i = \text{GSSG} + 2\text{H}^+$  and  $\sum_i B_i = 2\text{GSH}$  using the thermodynamic cycle (Fig. 3 in the main text) following the procedure described in the Computational methodology. The calculated redox potentials (in Volts) after correction for pH = 7 (considering pH effect of -59 mV/pH unit<sup>3;4</sup>) along with their deviations from the experimental value are presented in Table S5. Among the functional used, the M06-2X predicts the least deviation of 0.049 V. This level of accuracy in redox potential (within 50 mV, equivalent to free energy of reaction within 5 kJ/mol) to experimental result have been predicted for implicit-solvent model in the literature<sup>5</sup>. Based on these observations, M06-2X/6-311++g(2df,2pd) level of theory was used to calculate the redox potential in this study.

Table S1: Calculated redox potentials (in V) for GSSG|2GSH couple at pH = 7 using the studied functionals with 6-311++g(2df,2pd) basis set<sup>1;2;3;4</sup>.

| Functional      | $E_{rel,SHE}^o(\text{GSSG} 2\text{GSH})$ | Deviation |
|-----------------|------------------------------------------|-----------|
| B3LYP           | -0.010                                   | -0.230    |
| $\omega$ B97X-D | -0.127                                   | -0.113    |
| M06-2X          | -0.289                                   | 0.049     |
| Experimental    | -0.240                                   | 0         |

## Solvation energy calculation

As mentioned in the Computational methodology section, the free energy of species in solvent is calculated from the corresponding gas-phase geometries using a single-point calculation. To assess the impact of fully optimizing the geometries in the solvent phase few compounds were optimized fully in the solvent. The results are shown in Table S2 below. The maximum deviation was obtained for GSSG (0.042 V) with a mean absolute deviation (MAD) in the calculated redox potentials by these two methods for the studied compounds of 0.011 V. Thus using single-point geometry optimization in solvent phase it provides a reasonable compromise between the computational cost and accuracy in the result<sup>6</sup>.

Table S2: Calculated redox potentials,  $E_{rel,SHE}^o(A|B)$  at pH = 7 in Volts, at M06-2X/6-311++g(2df,2pd) level of theory. Here A|B is either RSeSG|(RSeH + GSH) or GSSG|2GSH couple.

| Compoundd        | $E_{rel,SHE}^o(A B)^a$ | $E_{rel,SHE}^o(A B)^b$ |
|------------------|------------------------|------------------------|
| GSSG             | -0.289                 | -0.247                 |
| <b>1b</b>        | -0.251                 | -0.268                 |
| <b>4b</b>        | -0.264                 | -0.292                 |
| <b>6b</b>        | -0.396                 | -0.435                 |
| MAD <sup>c</sup> |                        | 0.011                  |

<sup>a</sup> Redox potentials were calculated using a single-point method based on gas-phase optimized geometries in the solvent phase. <sup>b</sup> Redox potentials calculated using full geometry optimization in the solvent phase. <sup>c</sup> Mean absolute deviations in  $E_{rel,SHE}^o(A|B)^b$  compared to  $E_{rel,SHE}^o(A|B)^a$ .

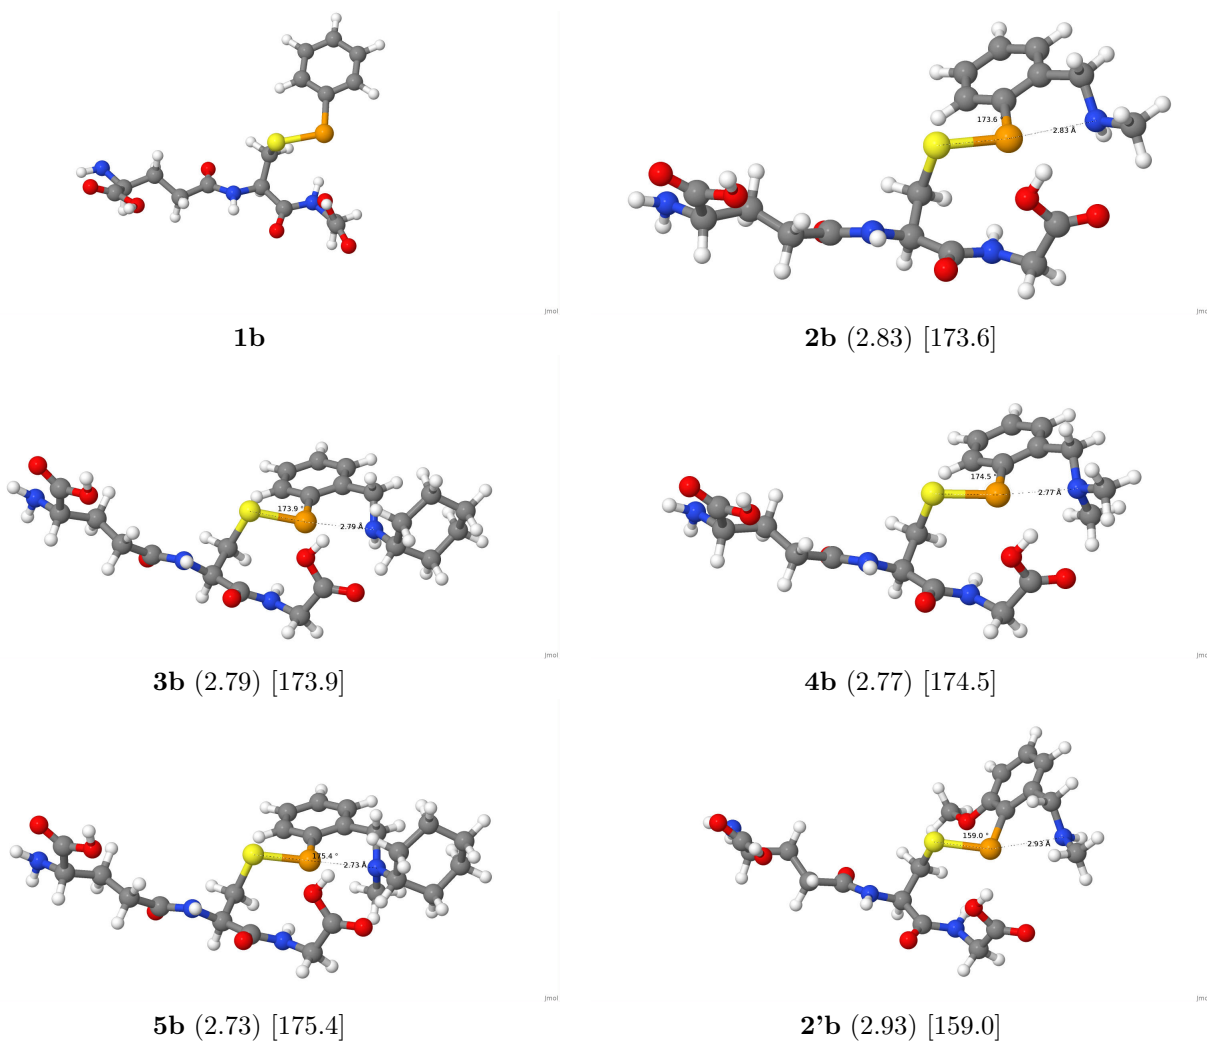

Figure S1: Gas-phase optimized geometries at M06-2X/6-311++g(2df,2pd) level of theory of phenyl selenide based selenenyl sulfide (**1b**) and amine-based selenenyl sulfides **2b** to **5b** and **2'b**. The bond distance  $r_{N...Se}$  in Å is given in parentheses and  $\angle_{N...Se-S}$  in degrees is given in square brackets. Colour scheme: white – hydrogen, grey – carbon, blue – nitrogen, red – oxygen, yellow – sulfur and orange – selenium

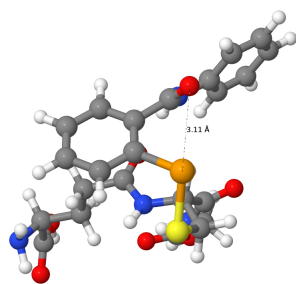

**6b** (3.11)

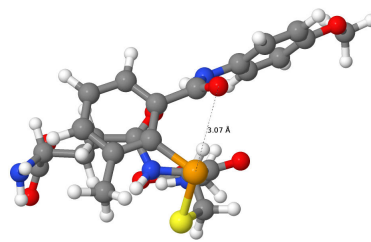

**7b** (3.07)

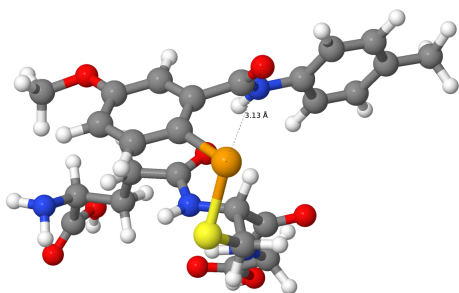

**8b** (3.13)

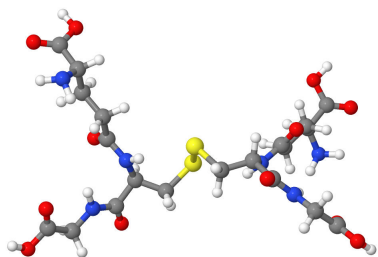

GSSG

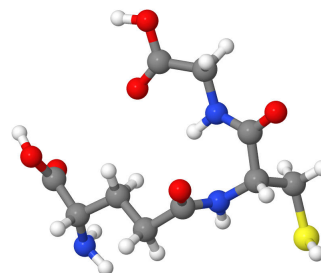

GSH

Figure S2: Gas-phase optimized geometries at M06-2X/6-311++g(2df,2pd) level of theory of ebselen-based (amide-based) senenyl sulfide **6b** to **8b**, GSSG and GSH. The bond distance  $r_{OSe}$  in Å is given in parentheses. Colour scheme: white – hydrogen, grey – carbon, blue – nitrogen, red – oxygen, yellow – sulfur and orange – selenium

## Molecular docking studies

To simulate the interactions between RSeSG (ligand) with the active site of GR, we have employed molecular docking study. M06-2X/6-311++G(2df,2pd) gas-phase optimized geometries of the ligands were docked into GR (PDB ID: 2GH5<sup>7</sup>) using Autodock Vina software<sup>8</sup>. The default Vina force field was applied with an exhaustiveness of 64 for rigid docking. The best docking pose of the ligands at the catalytic site of GR are shown in Figures S3 and S4. The data on binding affinities of the docked compounds along with the distances of closest approach are summarized in Table S3. The binding affinities of the docked compounds ranged from  $-6.1$  to  $-8.1$  kcal mol<sup>-1</sup>, where more negative values indicate stronger binding to the catalytic site. The distance between  $S_{CYS-58}$  and  $S_{ligand}/Se_{ligand}$  lies between 4.6 to 9.6 Å, while the distance between  $N_{HIS-467}$  to  $S_{ligand}/Se_{ligand}$  are between 4.1 to 8.0 Å. Usually, the approach to the active site by  $S_{ligand}$  is found to be relatively closer than that of the  $Se_{ligand}$ . The RMSD values around 5 Å for some of the ligands suggests that these ligands can approach the active site of GR and possibly get reduced.

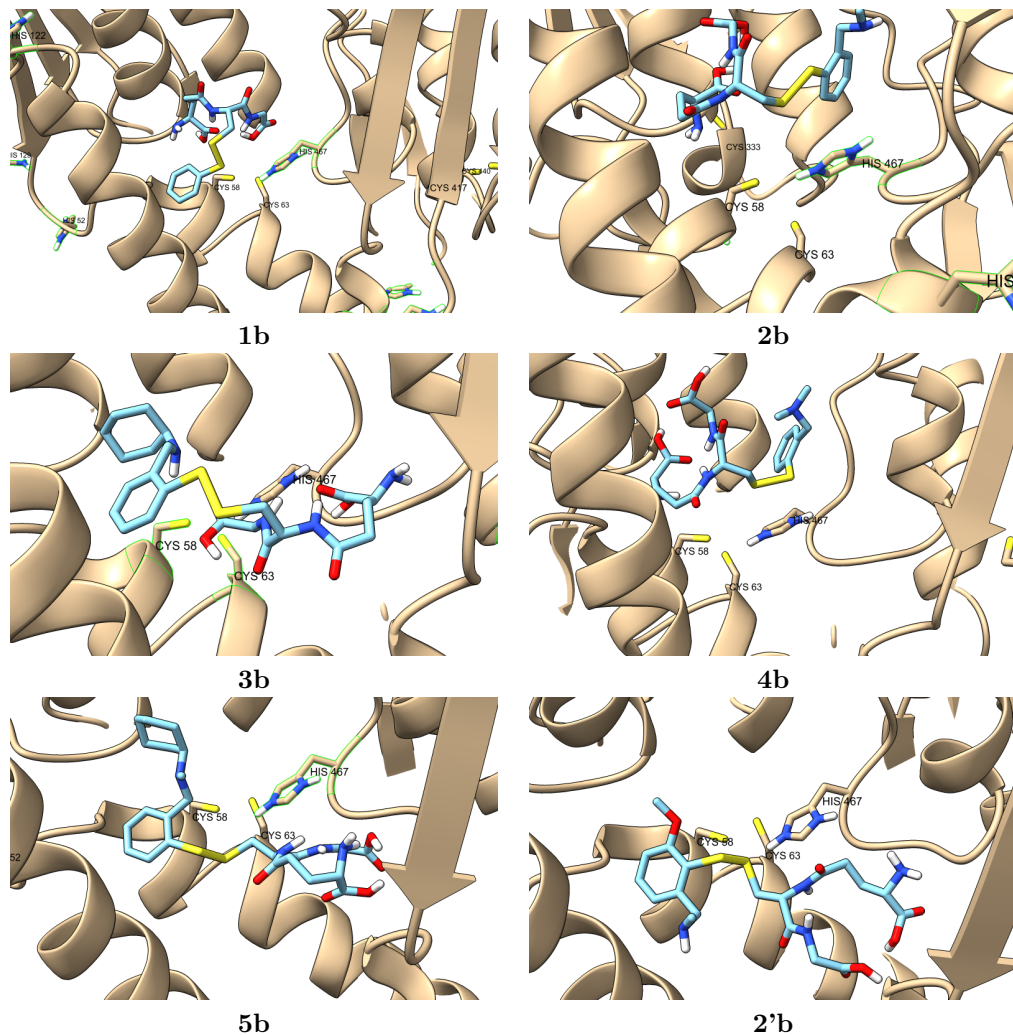

Figure S3: Best pose structure obtained from molecular docking study for (1b) and amine-based selenenyl sulfides 2b to 5b and 2'b with glutathione reductase enzyme (PDB: 2GH5).

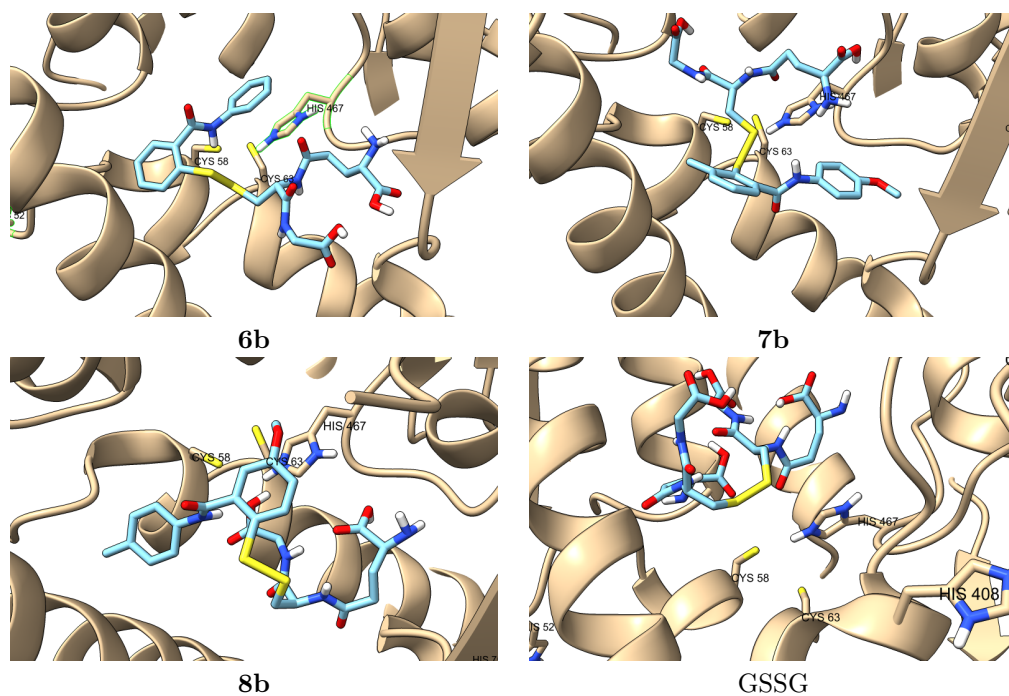

Figure S4: Best pose structure obtained from molecular docking study for ebselen-based (amide-based) senenyl sulfide **6b** to **8b**, and GSSG with glutathione reductase enzyme (PDB: 2GH5).

Table S3: Docking results of GSSG and RSeSG-type compounds with active site of GR (PDB ID: 2GH5).

| Compound   | Affinity<br>(kcal mol <sup>-1</sup> ) | Distances between atoms (Å)                             |                                                          |                                                          |                                                           | RMSD <sup>a</sup> |
|------------|---------------------------------------|---------------------------------------------------------|----------------------------------------------------------|----------------------------------------------------------|-----------------------------------------------------------|-------------------|
|            |                                       | S <sub>ligand</sub> <sup>-</sup><br>S <sub>CYS-58</sub> | Se <sub>ligand</sub> <sup>-</sup><br>S <sub>CYS-58</sub> | S <sub>ligand</sub> <sup>-</sup><br>N <sub>HIS-467</sub> | Se <sub>ligand</sub> <sup>-</sup><br>N <sub>HIS-467</sub> |                   |
| <b>1b</b>  | -6.1                                  | 8.0                                                     | 6.3                                                      | 8.0                                                      | 6.4                                                       | 6.4               |
| <b>2b</b>  | -6.5                                  | 5.0                                                     | 7.0                                                      | 4.1                                                      | 5.3                                                       | 4.6               |
| <b>3b</b>  | -7.5                                  | 8.0                                                     | 8.9                                                      | 8.2                                                      | 7.5                                                       | 7.8               |
| <b>4b</b>  | -6.7                                  | 5.7                                                     | 7.1                                                      | 4.7                                                      | 5.0                                                       | 5.2               |
| <b>5b</b>  | -7.2                                  | 5.4                                                     | 6.8                                                      | 5.2                                                      | 6.9                                                       | 5.3               |
| GSSG       | -6.2                                  | 4.6(S1)                                                 | 5.7(S2)                                                  | 4.8(S1)                                                  | 4.5(S2)                                                   | 4.6               |
| <b>6b</b>  | -7.7                                  | 5.5                                                     | 6.9                                                      | 5.3                                                      | 6.9                                                       | 5.4               |
| <b>7b</b>  | -8.1                                  | 4.7                                                     | 5.0                                                      | 4.0                                                      | 5.1                                                       | 4.4               |
| <b>8b</b>  | -7.3                                  | 8.9                                                     | 9.6                                                      | 8.0                                                      | 7.9                                                       | 8.4               |
| <b>2'b</b> | -6.8                                  | 4.6                                                     | 6.1                                                      | 4.1                                                      | 6.1                                                       | 4.4               |

<sup>a</sup> Root mean square deviation was calculated using the shortest distance of approach by S<sub>ligand</sub>/Se<sub>ligand</sub>.



Table S4: Electronic energy in gas-phase ( $\epsilon_0, gas$ ), electronic energy in solvent ( $\epsilon_0, solv$ ), and thermal correction to free energy ( $G_{corr, gas}$ ) for the phenyl selenide-based RSeSG (**1b**), amine-based RSeSG (**2b - 5b** and **2'b**), amide-based RSeSG (**6b - 8b**) and GSSG. All energies are reported in Hartrees

|                    | <b>1b</b>    | <b>2b</b>    | <b>3b</b>    | <b>4b</b>    | <b>5b</b>    |
|--------------------|--------------|--------------|--------------|--------------|--------------|
| RSeSG              |              |              |              |              |              |
| $\epsilon_0, gas$  | -4037.72219  | -4171.680053 | -4367.014094 | -4210.982912 | -4406.313896 |
| $\epsilon_0, solv$ | -4037.751136 | -4171.709512 | -4367.043189 | -4211.011396 | -4406.342617 |
| $G_{corr, gas}$    | 0.310989     | 0.381205     | 0.50037      | 0.407874     | 0.527085     |
| RSeH               |              |              |              |              |              |
| $\epsilon_0, gas$  | -2633.765232 | -2767.722042 | -2963.054403 | -2807.024173 | -3002.353443 |
| $\epsilon_0, solv$ | -2633.769912 | -2767.727992 | -2963.059777 | -2807.029143 | -3002.358474 |
| $G_{corr, gas}$    | 0.066898     | 0.136854     | 0.25452      | 0.163726     | 0.282215     |
|                    | <b>6b</b>    | <b>7b</b>    | <b>8b</b>    | <b>2'b</b>   | GSSG         |
| RSeSG              |              |              |              |              |              |
| $\epsilon_0, gas$  | -4437.469852 | -4591.299047 | -4591.306904 | -4286.199868 | -2809.083253 |
| $\epsilon_0, solv$ | -4437.504439 | -4591.334905 | -4591.340484 | -4286.230895 | -2809.137495 |
| $G_{corr, gas}$    | 0.412982     | 0.4682       | 0.470142     | 0.411504     | 0.475483     |
| RSeH               |              |              |              |              |              |
| $\epsilon_0, gas$  | -3033.497081 | -3187.325562 | -3187.326213 | -2882.243046 | -1405.131377 |
| $\epsilon_0, solv$ | -3033.509365 | -3187.339805 | -3187.340262 | -2882.25082  | -1405.160077 |
| $G_{corr, gas}$    | 0.165675     | 0.221426     | 0.221146     | 0.167039     | 0.238003     |

## Coordinates of optimized geometries in gas phase

Table S5: Coordinates of optimized geometry of GSSG and GSH in gas phase used for benchmark study using B3LYP at 6-311++g(2df,2pd) level of theory.

| GSSG |              |              |              |
|------|--------------|--------------|--------------|
| 7    | -6.097656000 | -1.854773000 | -3.382289000 |
| 6    | -6.105040000 | -2.701522000 | -2.198395000 |
| 6    | -7.485564000 | -3.321897000 | -2.079778000 |
| 8    | -8.507515000 | -2.802072000 | -2.444411000 |
| 8    | -7.450931000 | -4.522805000 | -1.464977000 |
| 6    | -5.780274000 | -2.012999000 | -0.849858000 |
| 6    | -4.347011000 | -1.487734000 | -0.783282000 |
| 6    | -3.994449000 | -0.950387000 | 0.597343000  |
| 8    | -4.423159000 | -1.438880000 | 1.625001000  |
| 7    | -3.145323000 | 0.129365000  | 0.607178000  |
| 6    | -2.529278000 | 0.594025000  | 1.838119000  |
| 6    | -3.316175000 | 1.693270000  | 2.584722000  |
| 8    | -2.901528000 | 2.123716000  | 3.649245000  |
| 6    | -1.106466000 | 1.110126000  | 1.610284000  |
| 16   | 0.095058000  | -0.152564000 | 1.033571000  |
| 7    | -4.443085000 | 2.136036000  | 1.993388000  |
| 6    | -5.301769000 | 3.102944000  | 2.628470000  |
| 6    | -6.484098000 | 3.388784000  | 1.736235000  |
| 8    | -6.680655000 | 2.873624000  | 0.665726000  |
| 8    | -7.305432000 | 4.297963000  | 2.287557000  |
| 7    | 4.443147000  | 2.144960000  | -1.987324000 |
| 6    | 5.300829000  | 3.114408000  | -2.619880000 |
| 6    | 6.482886000  | 3.399149000  | -1.726938000 |
| 8    | 6.680034000  | 2.881396000  | -0.657790000 |

|     |              |              |              |
|-----|--------------|--------------|--------------|
| 8   | 7.303270000  | 4.310590000  | -2.275939000 |
| 6   | 3.316372000  | 1.703040000  | -2.579546000 |
| 8   | 2.901073000  | 2.136187000  | -3.642721000 |
| 6   | 2.530533000  | 0.601118000  | -1.835792000 |
| 7   | 3.147181000  | 0.133671000  | -0.606207000 |
| 6   | 1.107299000  | 1.115366000  | -1.606389000 |
| 16  | -0.093044000 | -0.149950000 | -1.032984000 |
| 6   | 6.104454000  | -2.709351000 | 2.190869000  |
| 6   | 7.482043000  | -3.335638000 | 2.069253000  |
| 8   | 8.506873000  | -2.820721000 | 2.432767000  |
| 8   | 7.441119000  | -4.535673000 | 1.453133000  |
| 7   | 6.102808000  | -1.863774000 | 3.375630000  |
| 6   | 5.780393000  | -2.018037000 | 0.843594000  |
| 6   | 4.349303000  | -1.486685000 | 0.779927000  |
| 6   | 3.996678000  | -0.945845000 | -0.599338000 |
| 8   | 4.425417000  | -1.431454000 | -1.628334000 |
| 1   | -5.282814000 | -1.259408000 | -3.421675000 |
| 1   | -6.930854000 | -1.279694000 | -3.414512000 |
| 1   | -5.391247000 | -3.516162000 | -2.343119000 |
| 1   | -8.365209000 | -4.828910000 | -1.374560000 |
| 1   | -6.485686000 | -1.193334000 | -0.693695000 |
| 1   | -5.922989000 | -2.720358000 | -0.033176000 |
| 1   | -3.644860000 | -2.302662000 | -0.988031000 |
| 1   | -4.167517000 | -0.719615000 | -1.538205000 |
| 1   | -2.714815000 | 0.397724000  | -0.263730000 |
| 1   | -2.502531000 | -0.246941000 | 2.532529000  |
| 1   | -1.088084000 | 1.947221000  | 0.912510000  |
| 1   | -0.718948000 | 1.464868000  | 2.563851000  |
| 1   | -4.768182000 | 1.717531000  | 1.135961000  |
| 1   | -5.665434000 | 2.746150000  | 3.595903000  |
| 1   | -4.771686000 | 4.036028000  | 2.831867000  |
| 1   | -8.047334000 | 4.435418000  | 1.680462000  |
| 1   | 4.768740000  | 1.724365000  | -1.131107000 |
| 1   | 5.664851000  | 2.760540000  | -3.588255000 |
| 1   | 4.769759000  | 4.047461000  | -2.820823000 |
| 1   | 8.045062000  | 4.447226000  | -1.668525000 |
| 1   | 2.504411000  | -0.238009000 | -2.532445000 |
| 1   | 2.716699000  | 0.399526000  | 0.265489000  |
| 1   | 0.719369000  | 1.472377000  | -2.558941000 |
| 1   | 1.088262000  | 1.950535000  | -0.906328000 |
| 1   | 5.387371000  | -3.521027000 | 2.336002000  |
| 1   | 8.353895000  | -4.845670000 | 1.360823000  |
| 1   | 6.938710000  | -1.292590000 | 3.407114000  |
| 1   | 5.290811000  | -1.264659000 | 3.416854000  |
| 1   | 5.918873000  | -2.725087000 | 0.025922000  |
| 1   | 6.488990000  | -1.201200000 | 0.687102000  |
| 1   | 4.174172000  | -0.718751000 | 1.536080000  |
| 1   | 3.643969000  | -2.298834000 | 0.984858000  |
| GSH |              |              |              |
| 7   | 2.350042000  | 1.142867000  | 0.050373000  |
| 6   | 2.822225000  | 2.484448000  | 0.278874000  |
| 6   | 1.994380000  | 3.455366000  | -0.524893000 |
| 8   | 1.066365000  | 3.153610000  | -1.230695000 |
| 8   | 2.420059000  | 4.719227000  | -0.356695000 |
| 6   | 2.845749000  | 0.095630000  | 0.742371000  |
| 8   | 3.786001000  | 0.183607000  | 1.513807000  |

|    |              |              |              |
|----|--------------|--------------|--------------|
| 6  | 2.207536000  | -1.278416000 | 0.463349000  |
| 7  | 0.910363000  | -1.218176000 | -0.191754000 |
| 6  | 3.210885000  | -2.087209000 | -0.369612000 |
| 16 | 2.683004000  | -3.785834000 | -0.807114000 |
| 6  | -4.027515000 | -0.631618000 | -0.361134000 |
| 6  | -5.075538000 | 0.263715000  | 0.274838000  |
| 8  | -5.491315000 | 1.285790000  | -0.204796000 |
| 8  | -5.466121000 | -0.192344000 | 1.483615000  |
| 7  | -4.154879000 | -0.509831000 | -1.806278000 |
| 6  | -2.653750000 | -0.258255000 | 0.247928000  |
| 6  | -1.537294000 | -1.204838000 | -0.187323000 |
| 6  | -0.222014000 | -0.917269000 | 0.525776000  |
| 8  | -0.163564000 | -0.456350000 | 1.649390000  |
| 1  | 1.518790000  | 1.034444000  | -0.509620000 |
| 1  | 2.760792000  | 2.755957000  | 1.336284000  |
| 1  | 3.872689000  | 2.595717000  | 0.000338000  |
| 1  | 1.849917000  | 5.296722000  | -0.884998000 |
| 1  | 2.099157000  | -1.735757000 | 1.448534000  |
| 1  | 0.795295000  | -1.812294000 | -0.999243000 |
| 1  | 4.157412000  | -2.117551000 | 0.161029000  |
| 1  | 3.384830000  | -1.603231000 | -1.331819000 |
| 1  | -4.257825000 | -1.660010000 | -0.071539000 |
| 1  | -6.086856000 | 0.453975000  | 1.850627000  |
| 1  | -4.258494000 | 0.461953000  | -2.072788000 |
| 1  | -3.362385000 | -0.902512000 | -2.293931000 |
| 1  | -2.716558000 | -0.279397000 | 1.335668000  |
| 1  | -2.406435000 | 0.766343000  | -0.039113000 |
| 1  | -1.382105000 | -1.171321000 | -1.267720000 |
| 1  | -1.809267000 | -2.236802000 | 0.059823000  |
| 1  | 2.574925000  | -4.254572000 | 0.447849000  |

Table S6: Coordinates of optimized geometry of GSSG and GSH in gas phase used for benchmark study using wB97-XD at 6-311++g(2df,2pd) level of theory.

| GSSG |              |              |              |
|------|--------------|--------------|--------------|
| 7    | 6.167026000  | -1.939730000 | 3.223699000  |
| 6    | 5.420017000  | -2.844815000 | 2.374658000  |
| 6    | 6.211075000  | -4.130167000 | 2.254133000  |
| 8    | 7.406972000  | -4.205378000 | 2.309277000  |
| 8    | 5.423116000  | -5.189554000 | 2.020055000  |
| 6    | 5.121110000  | -2.352899000 | 0.943937000  |
| 6    | 4.196902000  | -1.147980000 | 0.929597000  |
| 6    | 3.869349000  | -0.680984000 | -0.476559000 |
| 8    | 4.278069000  | -1.224973000 | -1.477823000 |
| 7    | 3.079027000  | 0.436664000  | -0.528341000 |
| 6    | 2.493793000  | 0.885763000  | -1.769459000 |
| 6    | 3.285467000  | 1.993538000  | -2.481169000 |
| 8    | 2.863899000  | 2.490940000  | -3.508348000 |
| 6    | 1.058099000  | 1.366846000  | -1.584148000 |
| 16   | -0.102597000 | 0.084594000  | -1.023219000 |
| 7    | 4.442634000  | 2.356121000  | -1.903782000 |
| 6    | 5.318716000  | 3.313987000  | -2.511940000 |
| 6    | 6.522282000  | 3.513007000  | -1.629994000 |
| 8    | 6.708019000  | 2.946066000  | -0.587745000 |
| 8    | 7.370216000  | 4.402660000  | -2.149768000 |
| 7    | -4.443206000 | 2.356403000  | 1.903369000  |
| 6    | -5.319229000 | 3.314496000  | 2.511250000  |
| 6    | -6.522562000 | 3.513683000  | 1.629024000  |
| 8    | -6.708243000 | 2.946602000  | 0.586839000  |
| 8    | -7.370407000 | 4.403587000  | 2.148511000  |
| 6    | -3.285927000 | 1.994113000  | 2.480713000  |
| 8    | -2.864286000 | 2.491850000  | 3.507701000  |
| 6    | -2.494251000 | 0.886185000  | 1.769241000  |
| 7    | -3.079510000 | 0.436788000  | 0.528244000  |
| 6    | -1.058568000 | 1.367253000  | 1.583785000  |
| 16   | 0.102158000  | 0.084876000  | 1.023204000  |
| 6    | -5.419795000 | -2.845862000 | -2.374001000 |
| 6    | -6.209286000 | -4.132159000 | -2.253286000 |
| 8    | -7.405130000 | -4.208744000 | -2.307674000 |
| 8    | -5.419951000 | -5.190681000 | -2.019932000 |
| 7    | -6.168444000 | -1.941402000 | -3.222262000 |
| 6    | -5.120457000 | -2.353994000 | -0.943352000 |
| 6    | -4.197565000 | -1.148064000 | -0.929328000 |
| 6    | -3.869793000 | -0.680899000 | 0.476722000  |
| 8    | -4.278356000 | -1.224772000 | 1.478114000  |
| 1    | 5.794712000  | -1.002671000 | 3.202900000  |
| 1    | 7.139734000  | -1.915589000 | 2.946651000  |
| 1    | 4.472098000  | -3.087286000 | 2.861319000  |
| 1    | 5.997475000  | -5.953668000 | 1.895397000  |
| 1    | 6.060762000  | -2.105965000 | 0.446657000  |
| 1    | 4.661453000  | -3.157275000 | 0.368909000  |
| 1    | 3.255625000  | -1.379441000 | 1.438302000  |
| 1    | 4.637766000  | -0.302837000 | 1.465568000  |
| 1    | 2.651181000  | 0.744875000  | 0.329481000  |
| 1    | 2.505939000  | 0.041623000  | -2.461913000 |
| 1    | 1.004826000  | 2.211819000  | -0.896261000 |
| 1    | 0.684380000  | 1.706067000  | -2.549050000 |

|     |              |              |              |
|-----|--------------|--------------|--------------|
| 1   | 4.764045000  | 1.891854000  | -1.069978000 |
| 1   | 5.653582000  | 2.987310000  | -3.499797000 |
| 1   | 4.821407000  | 4.274863000  | -2.660571000 |
| 1   | 8.120539000  | 4.482341000  | -1.549569000 |
| 1   | -4.764598000 | 1.891981000  | 1.069646000  |
| 1   | -5.654405000 | 2.987977000  | 3.499057000  |
| 1   | -4.821737000 | 4.275268000  | 2.659918000  |
| 1   | -8.120607000 | 4.483331000  | 1.548167000  |
| 1   | -2.506367000 | 0.042202000  | 2.461885000  |
| 1   | -2.651739000 | 0.744867000  | -0.329663000 |
| 1   | -0.684851000 | 1.706756000  | 2.548586000  |
| 1   | -1.005323000 | 2.212037000  | 0.895663000  |
| 1   | -4.471938000 | -3.087112000 | -2.861393000 |
| 1   | -5.993346000 | -5.955488000 | -1.895083000 |
| 1   | -7.141005000 | -1.918549000 | -2.944589000 |
| 1   | -5.797270000 | -1.003892000 | -3.201382000 |
| 1   | -4.659523000 | -3.158027000 | -0.368860000 |
| 1   | -6.060033000 | -2.108227000 | -0.445358000 |
| 1   | -4.639705000 | -0.303301000 | -1.464854000 |
| 1   | -3.256349000 | -1.378368000 | -1.438662000 |
| GSH |              |              |              |
| 7   | -1.397836000 | -1.605421000 | -0.230379000 |
| 6   | -1.166905000 | -3.019899000 | -0.189323000 |
| 6   | 0.303386000  | -3.291671000 | -0.360729000 |
| 8   | 1.147818000  | -2.447361000 | -0.494233000 |
| 8   | 0.565009000  | -4.600470000 | -0.350629000 |
| 6   | -2.540160000 | -1.073063000 | 0.248004000  |
| 8   | -3.503384000 | -1.735527000 | 0.574802000  |
| 6   | -2.602835000 | 0.459239000  | 0.294097000  |
| 7   | -1.306485000 | 1.093483000  | 0.248285000  |
| 6   | -3.477394000 | 0.915310000  | -0.874101000 |
| 16  | -3.680283000 | 2.715113000  | -1.022610000 |
| 6   | 3.241481000  | 1.586123000  | 0.309691000  |
| 6   | 4.151609000  | 0.594349000  | -0.384446000 |
| 8   | 4.384938000  | 0.592398000  | -1.561300000 |
| 8   | 4.630683000  | -0.330171000 | 0.458114000  |
| 7   | 3.319659000  | 2.841458000  | -0.405573000 |
| 6   | 1.847724000  | 0.931935000  | 0.398745000  |
| 6   | 0.837521000  | 1.791035000  | 1.162868000  |
| 6   | -0.460446000 | 1.030274000  | 1.321484000  |
| 8   | -0.702804000 | 0.335212000  | 2.284711000  |
| 1   | -0.591832000 | -1.017046000 | -0.367670000 |
| 1   | -1.498930000 | -3.443709000 | 0.761614000  |
| 1   | -1.715269000 | -3.551620000 | -0.970467000 |
| 1   | 1.516137000  | -4.712415000 | -0.460183000 |
| 1   | -3.101323000 | 0.689873000  | 1.238093000  |
| 1   | -1.198256000 | 1.858895000  | -0.397175000 |
| 1   | -4.446908000 | 0.432539000  | -0.791890000 |
| 1   | -3.030878000 | 0.607264000  | -1.821080000 |
| 1   | 3.615871000  | 1.731214000  | 1.325249000  |
| 1   | 5.134410000  | -0.963276000 | -0.065865000 |
| 1   | 3.220392000  | 2.694561000  | -1.401350000 |
| 1   | 2.627755000  | 3.504611000  | -0.091864000 |
| 1   | 1.936232000  | -0.035880000 | 0.895403000  |
| 1   | 1.487711000  | 0.741448000  | -0.615838000 |
| 1   | 0.663724000  | 2.736639000  | 0.643764000  |

|   |              |             |             |
|---|--------------|-------------|-------------|
| 1 | 1.208332000  | 2.009676000 | 2.163360000 |
| 1 | -4.231965000 | 2.914351000 | 0.181865000 |

Table S7: Coordinates of optimized geometry of GSSG and GSH in gas phase used for benchmark study using M06-2X at 6-311++g(2df,2pd) level of theory.

| GSSH |              |              |              |
|------|--------------|--------------|--------------|
| 7    | -6.443004000 | 1.880325000  | 3.139594000  |
| 6    | -5.739304000 | 2.806307000  | 2.274482000  |
| 6    | -6.617398000 | 4.024064000  | 2.089140000  |
| 8    | -7.812449000 | 4.023082000  | 2.170211000  |
| 8    | -5.905270000 | 5.113574000  | 1.760654000  |
| 6    | -5.382203000 | 2.287303000  | 0.868601000  |
| 6    | -4.380817000 | 1.145696000  | 0.916408000  |
| 6    | -4.020384000 | 0.650288000  | -0.471938000 |
| 8    | -4.535284000 | 1.066065000  | -1.485175000 |
| 7    | -3.075572000 | -0.341097000 | -0.499428000 |
| 6    | -2.499501000 | -0.775738000 | -1.751750000 |
| 6    | -3.291972000 | -1.875814000 | -2.471685000 |
| 8    | -2.893846000 | -2.319474000 | -3.530978000 |
| 6    | -1.070379000 | -1.272688000 | -1.569807000 |
| 16   | 0.098297000  | 0.009923000  | -1.022956000 |
| 7    | -4.410924000 | -2.308448000 | -1.864998000 |
| 6    | -5.265348000 | -3.268542000 | -2.504882000 |
| 6    | -6.449601000 | -3.541060000 | -1.616801000 |
| 8    | -6.640431000 | -3.020654000 | -0.553511000 |
| 8    | -7.273450000 | -4.440640000 | -2.161849000 |
| 7    | 4.410934000  | -2.308458000 | 1.865008000  |
| 6    | 5.265288000  | -3.268642000 | 2.504850000  |
| 6    | 6.449558000  | -3.541155000 | 1.616789000  |
| 8    | 6.640485000  | -3.020630000 | 0.553574000  |
| 8    | 7.273384000  | -4.440756000 | 2.161837000  |
| 6    | 3.291952000  | -1.875857000 | 2.471662000  |
| 8    | 2.893707000  | -2.319662000 | 3.530849000  |
| 6    | 2.499499000  | -0.775768000 | 1.751727000  |
| 7    | 3.075595000  | -0.341104000 | 0.499426000  |
| 6    | 1.070375000  | -1.272705000 | 1.569753000  |
| 16   | -0.098280000 | 0.009926000  | 1.022903000  |
| 6    | 5.739334000  | 2.806330000  | -2.274441000 |
| 6    | 6.617481000  | 4.024049000  | -2.089089000 |
| 8    | 7.812531000  | 4.023017000  | -2.170169000 |
| 8    | 5.905399000  | 5.113588000  | -1.760600000 |
| 7    | 6.442989000  | 1.880329000  | -3.139569000 |
| 6    | 5.382220000  | 2.287323000  | -0.868564000 |
| 6    | 4.380802000  | 1.145745000  | -0.916384000 |
| 6    | 4.020349000  | 0.650337000  | 0.471958000  |
| 8    | 4.535209000  | 1.066140000  | 1.485205000  |
| 1    | -6.040596000 | 0.954542000  | 3.112565000  |
| 1    | -7.417520000 | 1.823432000  | 2.867805000  |
| 1    | -4.820814000 | 3.136471000  | 2.766115000  |
| 1    | -6.529632000 | 5.833051000  | 1.599492000  |
| 1    | -6.292864000 | 1.958492000  | 0.365119000  |
| 1    | -4.964405000 | 3.099580000  | 0.273116000  |
| 1    | -3.462608000 | 1.454990000  | 1.424487000  |
| 1    | -4.774384000 | 0.292571000  | 1.475596000  |
| 1    | -2.582632000 | -0.557582000 | 0.353344000  |
| 1    | -2.502680000 | 0.070894000  | -2.441561000 |
| 1    | -1.024070000 | -2.109154000 | -0.871262000 |
| 1    | -0.705490000 | -1.619374000 | -2.535183000 |

|     |              |              |              |
|-----|--------------|--------------|--------------|
| 1   | -4.739055000 | -1.878911000 | -1.014275000 |
| 1   | -5.622768000 | -2.909556000 | -3.473165000 |
| 1   | -4.739779000 | -4.205521000 | -2.698709000 |
| 1   | -8.016381000 | -4.571026000 | -1.557758000 |
| 1   | 4.739118000  | -1.878865000 | 1.014332000  |
| 1   | 5.622691000  | -2.909746000 | 3.473172000  |
| 1   | 4.739665000  | -4.205608000 | 2.698588000  |
| 1   | 8.016359000  | -4.571090000 | 1.557789000  |
| 1   | 2.502672000  | 0.070853000  | 2.441552000  |
| 1   | 2.582704000  | -0.557632000 | -0.353365000 |
| 1   | 0.705469000  | -1.619405000 | 2.535117000  |
| 1   | 1.024070000  | -2.109159000 | 0.871193000  |
| 1   | 4.820855000  | 3.136538000  | -2.766064000 |
| 1   | 6.529793000  | 5.833038000  | -1.599439000 |
| 1   | 7.417503000  | 1.823385000  | -2.867782000 |
| 1   | 6.040536000  | 0.954565000  | -3.112554000 |
| 1   | 4.964446000  | 3.099604000  | -0.273069000 |
| 1   | 6.292874000  | 1.958481000  | -0.365089000 |
| 1   | 4.774340000  | 0.292616000  | -1.475585000 |
| 1   | 3.462600000  | 1.455075000  | -1.424454000 |
| GSH |              |              |              |
| 7   | 1.296551000  | 1.605527000  | -0.255726000 |
| 6   | 0.969719000  | 3.002787000  | -0.194486000 |
| 6   | -0.514359000 | 3.173207000  | -0.378721000 |
| 8   | -1.295822000 | 2.274227000  | -0.524815000 |
| 8   | -0.864786000 | 4.462595000  | -0.362440000 |
| 6   | 2.457915000  | 1.157782000  | 0.269426000  |
| 8   | 3.353275000  | 1.891504000  | 0.629748000  |
| 6   | 2.645488000  | -0.362328000 | 0.311031000  |
| 7   | 1.401501000  | -1.094156000 | 0.238118000  |
| 6   | 3.567122000  | -0.734287000 | -0.848787000 |
| 16  | 3.919005000  | -2.511025000 | -0.990281000 |
| 6   | -3.171546000 | -1.684590000 | 0.308877000  |
| 6   | -4.113484000 | -0.700912000 | -0.350264000 |
| 8   | -4.392426000 | -0.704129000 | -1.515393000 |
| 8   | -4.559407000 | 0.225697000  | 0.510388000  |
| 7   | -3.214626000 | -2.917367000 | -0.449330000 |
| 6   | -1.801581000 | -0.985485000 | 0.402931000  |
| 6   | -0.748914000 | -1.841817000 | 1.112722000  |
| 6   | 0.508836000  | -1.018586000 | 1.273910000  |
| 8   | 0.677014000  | -0.254322000 | 2.198871000  |
| 1   | 0.530644000  | 0.965202000  | -0.401503000 |
| 1   | 1.259839000  | 3.428856000  | 0.768955000  |
| 1   | 1.487350000  | 3.584611000  | -0.959941000 |
| 1   | -1.822488000 | 4.513716000  | -0.479093000 |
| 1   | 3.147887000  | -0.557374000 | 1.261318000  |
| 1   | 1.376754000  | -1.901072000 | -0.366812000 |
| 1   | 4.491124000  | -0.171558000 | -0.754288000 |
| 1   | 3.101015000  | -0.463574000 | -1.797137000 |
| 1   | -3.532722000 | -1.868446000 | 1.322993000  |
| 1   | -5.085647000 | 0.860748000  | 0.007450000  |
| 1   | -3.165668000 | -2.722287000 | -1.442265000 |
| 1   | -2.468229000 | -3.547629000 | -0.193861000 |
| 1   | -1.913632000 | -0.045020000 | 0.944954000  |
| 1   | -1.466285000 | -0.740232000 | -0.609054000 |
| 1   | -0.543746000 | -2.754232000 | 0.550200000  |



|   |              |              |             |
|---|--------------|--------------|-------------|
| 1 | -1.094424000 | -2.111844000 | 2.109809000 |
| 1 | 4.472207000  | -2.650677000 | 0.220636000 |

Table S8: Coordinates of the optimized geometry of radical of **1b** at M062-X/6-311++g(2df,2pd) level of theory.

|                   |              |              |              |
|-------------------|--------------|--------------|--------------|
| <b>1b</b> radical |              |              |              |
| 0                 | 2            |              |              |
| 6                 | 0.764565000  | 1.204825000  | -0.000031000 |
| 6                 | 0.068887000  | 0.000168000  | -0.000728000 |
| 6                 | 2.151944000  | 1.198754000  | -0.000041000 |
| 1                 | 2.686021000  | 2.139064000  | 0.000138000  |
| 6                 | 0.764973000  | -1.205123000 | -0.000291000 |
| 6                 | 2.850891000  | 0.000236000  | 0.000080000  |
| 1                 | 3.931511000  | 0.000241000  | 0.000367000  |
| 6                 | 2.151730000  | -1.198890000 | 0.000295000  |
| 1                 | 2.686130000  | -2.139011000 | 0.000565000  |
| 1                 | 0.228346000  | 2.144736000  | 0.000269000  |
| 34                | -1.831720000 | 0.000000000  | 0.000099000  |
| 1                 | 0.228517000  | -2.144862000 | -0.000408000 |

Table S9: Coordinates of the optimized geometry of radical of **2b** at M06-2X/6-311++g(2df,2pd) level of theory.

|                   |              |              |              |
|-------------------|--------------|--------------|--------------|
| <b>2b</b> radical |              |              |              |
| 0                 | 2            |              |              |
| 6                 | 1.895284000  | -1.079957000 | 0.202412000  |
| 6                 | 0.677456000  | -0.442212000 | -0.016117000 |
| 6                 | 3.074729000  | -0.349415000 | 0.220440000  |
| 1                 | 4.014788000  | -0.857698000 | 0.385520000  |
| 6                 | 0.643324000  | 0.945368000  | -0.198751000 |
| 6                 | 3.046001000  | 1.026361000  | 0.047232000  |
| 1                 | 3.961397000  | 1.600232000  | 0.076479000  |
| 6                 | 1.829482000  | 1.664964000  | -0.152031000 |
| 1                 | 1.797399000  | 2.740101000  | -0.279157000 |
| 1                 | 1.918320000  | -2.149800000 | 0.360771000  |
| 6                 | -0.677581000 | 1.617436000  | -0.449862000 |
| 1                 | -0.559253000 | 2.708086000  | -0.438198000 |
| 1                 | -1.039705000 | 1.336217000  | -1.444699000 |
| 7                 | -1.671051000 | 1.146392000  | 0.501568000  |
| 1                 | -1.397372000 | 1.371777000  | 1.449940000  |
| 34                | -0.929165000 | -1.454550000 | -0.093516000 |
| 1                 | -3.334153000 | 1.127381000  | -0.740204000 |
| 1                 | -3.135920000 | 2.655690000  | 0.135090000  |
| 6                 | -3.028279000 | 1.566901000  | 0.209806000  |
| 1                 | -3.699024000 | 1.201304000  | 0.984245000  |

Table S10: Coordinates of the optimized geometry of radical of **3b** at M06-2X/6-311++g(2df,2pd) level of theory.

|                   |              |              |              |
|-------------------|--------------|--------------|--------------|
| <b>3b</b> radical |              |              |              |
| 0                 | 2            |              |              |
| 6                 | 3.472238000  | -0.010096000 | 0.099086000  |
| 6                 | 2.091200000  | -0.126291000 | -0.027718000 |
| 6                 | 4.072949000  | 1.240842000  | 0.094646000  |
| 1                 | 5.147301000  | 1.316823000  | 0.191912000  |
| 6                 | 1.308428000  | 1.026811000  | -0.149413000 |
| 6                 | 3.299768000  | 2.387084000  | -0.016088000 |
| 1                 | 3.763938000  | 3.363056000  | -0.004950000 |
| 6                 | 1.920881000  | 2.271984000  | -0.130420000 |
| 1                 | 1.308140000  | 3.161679000  | -0.210278000 |
| 1                 | 4.076749000  | -0.901046000 | 0.204517000  |
| 6                 | -0.181173000 | 0.880256000  | -0.324002000 |
| 1                 | -0.664080000 | 1.858926000  | -0.224414000 |
| 1                 | -0.373485000 | 0.513239000  | -1.334276000 |
| 7                 | -0.667449000 | -0.119712000 | 0.609862000  |
| 1                 | -0.417754000 | 0.116205000  | 1.562595000  |
| 34                | 1.260631000  | -1.836250000 | -0.053562000 |
| 6                 | -2.533614000 | -0.867542000 | -0.885129000 |
| 6                 | -3.172635000 | 0.407189000  | -1.447649000 |
| 6                 | -4.193960000 | 1.001826000  | -0.480063000 |
| 6                 | -3.561680000 | 1.245367000  | 0.888171000  |
| 6                 | -3.021773000 | -0.062453000 | 1.459661000  |
| 6                 | -1.995150000 | -0.741134000 | 0.542874000  |
| 1                 | -1.744406000 | -1.239693000 | -1.540710000 |
| 1                 | -3.301838000 | -1.644581000 | -0.856959000 |
| 1                 | -3.647266000 | 0.173394000  | -2.401561000 |
| 1                 | -4.601367000 | 1.928129000  | -0.886416000 |
| 1                 | -5.033552000 | 0.309201000  | -0.363952000 |
| 1                 | -4.289637000 | 1.678529000  | 1.575057000  |
| 1                 | -2.750378000 | 1.972977000  | 0.792370000  |
| 1                 | -2.576938000 | 0.092675000  | 2.445342000  |
| 1                 | -3.856371000 | -0.756285000 | 1.600620000  |
| 1                 | -1.846974000 | -1.757917000 | 0.918989000  |
| 1                 | -2.414253000 | 1.162123000  | -1.659535000 |

Table S11: Coordinates of the optimized geometry of radical of **4b** at M06-2X/6-311++g(2df,2pd) level of theory.

|                   |              |              |              |
|-------------------|--------------|--------------|--------------|
| <b>4b</b> radical |              |              |              |
| 0                 | 2            |              |              |
| 6                 | -2.074232000 | 1.027161000  | 0.266935000  |
| 6                 | -0.831956000 | 0.487070000  | -0.056357000 |
| 6                 | -3.207862000 | 0.227735000  | 0.265475000  |
| 1                 | -4.166541000 | 0.661713000  | 0.514488000  |
| 6                 | -0.731480000 | -0.872653000 | -0.367957000 |
| 6                 | -3.110469000 | -1.123141000 | -0.035927000 |
| 1                 | -3.989891000 | -1.751225000 | -0.023378000 |
| 6                 | -1.870266000 | -1.665723000 | -0.342123000 |
| 1                 | -1.781871000 | -2.721408000 | -0.568265000 |
| 1                 | -2.151341000 | 2.075572000  | 0.522315000  |
| 6                 | 0.613683000  | -1.432456000 | -0.744398000 |
| 1                 | 0.593315000  | -2.531516000 | -0.718445000 |
| 1                 | 0.852498000  | -1.125826000 | -1.766582000 |
| 7                 | 1.656470000  | -0.898029000 | 0.117116000  |
| 6                 | 1.560507000  | -1.368414000 | 1.486648000  |
| 1                 | 1.754065000  | -2.448273000 | 1.555887000  |
| 1                 | 2.287452000  | -0.840020000 | 2.100718000  |
| 1                 | 0.563870000  | -1.165445000 | 1.875093000  |
| 34                | 0.717998000  | 1.586768000  | -0.082898000 |
| 1                 | 3.028110000  | -0.579906000 | -1.417235000 |
| 1                 | 3.279733000  | -2.100562000 | -0.525367000 |
| 6                 | 2.988479000  | -1.044978000 | -0.433439000 |
| 1                 | 3.704938000  | -0.544616000 | 0.216333000  |

Table S12: Coordinates of the optimized geometry of radical of **5b** at M06-2X/6-311++g(2df,2pd) level of theory.

|                   |              |              |              |
|-------------------|--------------|--------------|--------------|
| <b>5b</b> radical |              |              |              |
| 0                 | 2            |              |              |
| 6                 | -3.482062000 | 0.117408000  | -0.155345000 |
| 6                 | -2.090378000 | 0.161311000  | -0.155174000 |
| 6                 | -4.145241000 | -1.101044000 | -0.175428000 |
| 1                 | -5.226502000 | -1.119608000 | -0.178299000 |
| 6                 | -1.363149000 | -1.032475000 | -0.162473000 |
| 6                 | -3.426665000 | -2.287656000 | -0.175038000 |
| 1                 | -3.940262000 | -3.238603000 | -0.176415000 |
| 6                 | -2.039169000 | -2.244182000 | -0.160688000 |
| 1                 | -1.468812000 | -3.165171000 | -0.149785000 |
| 1                 | -4.046226000 | 1.040377000  | -0.137265000 |
| 6                 | 0.144486000  | -0.971247000 | -0.211683000 |
| 1                 | 0.561326000  | -1.959678000 | 0.025364000  |
| 1                 | 0.427718000  | -0.719077000 | -1.231446000 |
| 7                 | 0.645374000  | 0.072193000  | 0.666294000  |
| 6                 | 0.325660000  | -0.153392000 | 2.064353000  |
| 1                 | 0.821213000  | -1.046285000 | 2.465630000  |
| 1                 | 0.632821000  | 0.713396000  | 2.647916000  |
| 1                 | -0.749595000 | -0.278911000 | 2.177482000  |
| 34                | -1.174991000 | 1.826053000  | -0.135372000 |
| 6                 | 2.350338000  | 0.845547000  | -1.029389000 |
| 6                 | 3.001542000  | -0.383736000 | -1.678409000 |
| 6                 | 4.130965000  | -0.956478000 | -0.825884000 |
| 6                 | 3.639777000  | -1.238524000 | 0.591166000  |
| 6                 | 3.124322000  | 0.048169000  | 1.228117000  |
| 6                 | 1.966302000  | 0.694497000  | 0.448487000  |
| 1                 | 1.483876000  | 1.181560000  | -1.600544000 |
| 1                 | 3.076529000  | 1.661672000  | -1.067867000 |
| 1                 | 3.377324000  | -0.099859000 | -2.662403000 |
| 1                 | 4.526656000  | -1.861647000 | -1.287714000 |
| 1                 | 4.955135000  | -0.238074000 | -0.775919000 |
| 1                 | 4.442664000  | -1.657730000 | 1.198840000  |
| 1                 | 2.843178000  | -1.988471000 | 0.562499000  |
| 1                 | 2.842381000  | -0.111952000 | 2.267764000  |
| 1                 | 3.940810000  | 0.776571000  | 1.243388000  |
| 1                 | 1.841627000  | 1.705543000  | 0.850479000  |
| 1                 | 2.269853000  | -1.174404000 | -1.848806000 |

Table S13: Coordinates of the optimized geometry of radical of **6b** at M06-2X/6-311++g(2df,2pd) level of theory.

|                   |              |              |              |
|-------------------|--------------|--------------|--------------|
| <b>6b</b> radical |              |              |              |
| 0                 | 2            |              |              |
| 6                 | -3.539966000 | 0.772777000  | -0.098636000 |
| 6                 | -2.325058000 | 0.085861000  | -0.029578000 |
| 6                 | -3.581498000 | 2.148575000  | 0.021063000  |
| 1                 | -4.532998000 | 2.659450000  | -0.032656000 |
| 6                 | -1.141239000 | 0.813135000  | 0.147278000  |
| 6                 | -2.412081000 | 2.870980000  | 0.232673000  |
| 1                 | -2.444480000 | 3.943225000  | 0.359469000  |
| 6                 | -1.206229000 | 2.200120000  | 0.295959000  |
| 1                 | -0.308461000 | 2.767549000  | 0.503670000  |
| 1                 | -4.457502000 | 0.216841000  | -0.238389000 |
| 6                 | 0.144929000  | 0.057646000  | 0.202028000  |
| 8                 | 0.156052000  | -1.139833000 | 0.431340000  |
| 7                 | 1.275040000  | 0.782148000  | -0.036597000 |
| 1                 | 1.138106000  | 1.724667000  | -0.359473000 |
| 6                 | 2.614062000  | 0.348054000  | -0.028857000 |
| 6                 | 3.016925000  | -0.903308000 | 0.433118000  |
| 6                 | 3.570587000  | 1.250848000  | -0.495429000 |
| 1                 | 2.286303000  | -1.607962000 | 0.790068000  |
| 1                 | 3.256163000  | 2.223231000  | -0.854985000 |
| 6                 | 4.366898000  | -1.227023000 | 0.418891000  |
| 6                 | 4.911332000  | 0.912716000  | -0.503150000 |
| 1                 | 4.671649000  | -2.200156000 | 0.778537000  |
| 1                 | 5.637702000  | 1.624821000  | -0.869272000 |
| 6                 | 5.319016000  | -0.332962000 | -0.045047000 |
| 1                 | 6.365651000  | -0.601323000 | -0.050818000 |
| 34                | -2.359174000 | -1.796801000 | -0.191840000 |

Table S14: Coordinates of the optimized geometry of radical of **7b** at M06-2X/6-311++g(2df,2pd) level of theory.

|                   |              |              |              |
|-------------------|--------------|--------------|--------------|
| <b>7b</b> radical |              |              |              |
| 0                 | 2            |              |              |
| 6                 | -4.044468000 | 0.731743000  | -0.118408000 |
| 6                 | -2.803272000 | 0.078259000  | -0.017831000 |
| 6                 | -4.088405000 | 2.109038000  | 0.039816000  |
| 1                 | -5.045785000 | 2.609439000  | -0.031102000 |
| 6                 | -1.638483000 | 0.824340000  | 0.206925000  |
| 6                 | -2.943999000 | 2.849682000  | 0.304070000  |
| 1                 | -3.007090000 | 3.917674000  | 0.454428000  |
| 6                 | -1.726006000 | 2.205091000  | 0.385445000  |
| 1                 | -0.843845000 | 2.780784000  | 0.632008000  |
| 6                 | -0.335370000 | 0.098741000  | 0.276030000  |
| 8                 | -0.294407000 | -1.100811000 | 0.498359000  |
| 7                 | 0.778473000  | 0.850717000  | 0.059522000  |
| 1                 | 0.625702000  | 1.787728000  | -0.271826000 |
| 6                 | 2.125200000  | 0.430170000  | 0.066513000  |
| 6                 | 2.554534000  | -0.768526000 | 0.641086000  |
| 6                 | 3.065722000  | 1.277271000  | -0.502979000 |
| 1                 | 1.839832000  | -1.440980000 | 1.083680000  |
| 1                 | 2.744074000  | 2.208569000  | -0.953238000 |
| 6                 | 3.896991000  | -1.090063000 | 0.629902000  |
| 6                 | 4.416236000  | 0.955936000  | -0.512183000 |
| 1                 | 4.242109000  | -2.015326000 | 1.069244000  |
| 1                 | 5.115922000  | 1.640872000  | -0.965519000 |
| 6                 | 4.838788000  | -0.239121000 | 0.056637000  |
| 34                | -2.757889000 | -1.806765000 | -0.193813000 |
| 6                 | -5.303050000 | -0.042186000 | -0.384365000 |
| 1                 | -5.241235000 | -0.574806000 | -1.335460000 |
| 1                 | -5.467435000 | -0.791597000 | 0.392559000  |
| 1                 | -6.166226000 | 0.618675000  | -0.416900000 |
| 8                 | 6.129992000  | -0.654633000 | 0.100594000  |
| 6                 | 7.105811000  | 0.182132000  | -0.474033000 |
| 1                 | 6.922009000  | 0.329549000  | -1.540989000 |
| 1                 | 7.136701000  | 1.154221000  | 0.024046000  |
| 1                 | 8.058132000  | -0.321306000 | -0.339327000 |



Table S15: Coordinates of the optimized geometry of radical of **8b** at M06-2X/6-311++g(2df,2pd) level of theory.

|                   |              |              |              |
|-------------------|--------------|--------------|--------------|
| <b>8b</b> radical |              |              |              |
| 0                 | 2            |              |              |
| 6                 | 3.555110000  | 0.495273000  | -0.158753000 |
| 6                 | 2.224646000  | 0.889763000  | -0.063176000 |
| 6                 | 3.925599000  | -0.839463000 | -0.096315000 |
| 1                 | 4.970358000  | -1.099198000 | -0.173904000 |
| 6                 | 1.246556000  | -0.101359000 | 0.099796000  |
| 6                 | 2.952852000  | -1.816359000 | 0.091145000  |
| 6                 | 1.621134000  | -1.435742000 | 0.192202000  |
| 1                 | 4.325104000  | 1.245702000  | -0.279284000 |
| 6                 | -0.181905000 | 0.327246000  | 0.215773000  |
| 8                 | -0.464698000 | 1.460709000  | 0.561708000  |
| 7                 | -1.111484000 | -0.616256000 | -0.101261000 |
| 1                 | -0.759765000 | -1.468005000 | -0.504863000 |
| 6                 | -2.515400000 | -0.512649000 | -0.056290000 |
| 6                 | -3.195392000 | 0.565965000  | 0.500156000  |
| 6                 | -3.246487000 | -1.576536000 | -0.586912000 |
| 1                 | -2.648322000 | 1.396194000  | 0.911870000  |
| 1                 | -2.723982000 | -2.421550000 | -1.019195000 |
| 6                 | -4.584537000 | 0.559237000  | 0.512931000  |
| 6                 | -4.627180000 | -1.561902000 | -0.563583000 |
| 1                 | -5.100568000 | 1.404573000  | 0.950437000  |
| 1                 | -5.172877000 | -2.399509000 | -0.979994000 |
| 6                 | -5.326712000 | -0.489437000 | -0.013301000 |
| 34                | 1.813716000  | 2.735867000  | -0.181605000 |
| 6                 | -6.830561000 | -0.473198000 | -0.008887000 |
| 1                 | -7.222199000 | -0.338941000 | -1.018259000 |
| 1                 | -7.232317000 | -1.410718000 | 0.375230000  |
| 1                 | -7.212259000 | 0.337938000  | 0.607979000  |
| 1                 | 0.898889000  | -2.216443000 | 0.390484000  |
| 8                 | 3.204648000  | -3.143915000 | 0.201397000  |
| 6                 | 4.548922000  | -3.564016000 | 0.130776000  |
| 1                 | 4.992815000  | -3.306859000 | -0.833513000 |
| 1                 | 5.143094000  | -3.120859000 | 0.932966000  |
| 1                 | 4.536602000  | -4.643275000 | 0.245247000  |

Table S16: Coordinates of the optimized geometry of radical of **9b** at M06-2X/6-311++g(2df,2pd) level of theory.

|                   |              |              |              |
|-------------------|--------------|--------------|--------------|
| <b>9b</b> radical |              |              |              |
| 0                 | 2            |              |              |
| 6                 | 1.683309000  | 0.145739000  | 0.032043000  |
| 6                 | 0.288303000  | 0.119168000  | -0.100193000 |
| 6                 | 2.357005000  | 1.359667000  | 0.089902000  |
| 1                 | 3.430645000  | 1.386813000  | 0.196065000  |
| 6                 | -0.414785000 | 1.318785000  | -0.193073000 |
| 6                 | 1.642965000  | 2.549351000  | 0.014868000  |
| 1                 | 2.171981000  | 3.490500000  | 0.066499000  |
| 6                 | 0.267172000  | 2.530448000  | -0.123865000 |
| 1                 | -0.289433000 | 3.456366000  | -0.184106000 |
| 6                 | -1.905746000 | 1.277370000  | -0.386892000 |
| 1                 | -2.321809000 | 2.290998000  | -0.327095000 |
| 1                 | -2.123398000 | 0.892054000  | -1.389109000 |
| 7                 | -2.520884000 | 0.358032000  | 0.554781000  |
| 1                 | -2.343890000 | 0.648361000  | 1.508334000  |
| 34                | -0.606623000 | -1.554002000 | -0.155862000 |
| 1                 | -4.039359000 | -0.380532000 | -0.653384000 |
| 1                 | -4.533217000 | 1.027591000  | 0.302063000  |
| 6                 | -3.929562000 | 0.111642000  | 0.313621000  |
| 1                 | -4.321001000 | -0.555073000 | 1.078952000  |
| 8                 | 2.295552000  | -1.062088000 | 0.084692000  |
| 6                 | 3.695627000  | -1.091532000 | 0.238087000  |
| 1                 | 4.195263000  | -0.608964000 | -0.604773000 |
| 1                 | 4.001271000  | -0.605204000 | 1.167059000  |
| 1                 | 3.974178000  | -2.140209000 | 0.270824000  |

Table S17: Coordinates of the optimized geometry of radical of GS at M06-2X/6-311++g(2df,2pd) level of theory.

|            |              |              |              |
|------------|--------------|--------------|--------------|
| GS radical |              |              |              |
| 0          | 2            |              |              |
| 7          | -1.397836000 | -1.605421000 | -0.230379000 |
| 6          | -1.166905000 | -3.019899000 | -0.189323000 |
| 6          | 0.303386000  | -3.291671000 | -0.360729000 |
| 8          | 1.147818000  | -2.447361000 | -0.494233000 |
| 8          | 0.565009000  | -4.600470000 | -0.350629000 |
| 6          | -2.540160000 | -1.073063000 | 0.248004000  |
| 8          | -3.503384000 | -1.735527000 | 0.574802000  |
| 6          | -2.602835000 | 0.459239000  | 0.294097000  |
| 7          | -1.306485000 | 1.093483000  | 0.248285000  |
| 6          | -3.477394000 | 0.915310000  | -0.874101000 |
| 16         | -3.680283000 | 2.715113000  | -1.022610000 |
| 6          | 3.241481000  | 1.586123000  | 0.309691000  |
| 6          | 4.151609000  | 0.594349000  | -0.384446000 |
| 8          | 4.384938000  | 0.592398000  | -1.561300000 |
| 8          | 4.630683000  | -0.330171000 | 0.458114000  |
| 7          | 3.319659000  | 2.841458000  | -0.405573000 |
| 6          | 1.847724000  | 0.931935000  | 0.398745000  |
| 6          | 0.837521000  | 1.791035000  | 1.162868000  |
| 6          | -0.460446000 | 1.030274000  | 1.321484000  |
| 8          | -0.702804000 | 0.335212000  | 2.284711000  |
| 1          | -0.591832000 | -1.017046000 | -0.367670000 |
| 1          | -1.498930000 | -3.443709000 | 0.761614000  |
| 1          | -1.715269000 | -3.551620000 | -0.970467000 |
| 1          | 1.516137000  | -4.712415000 | -0.460183000 |
| 1          | -3.101323000 | 0.689873000  | 1.238093000  |
| 1          | -1.198256000 | 1.858895000  | -0.397175000 |
| 1          | -4.446908000 | 0.432539000  | -0.791890000 |
| 1          | -3.030878000 | 0.607264000  | -1.821080000 |
| 1          | 3.615871000  | 1.731214000  | 1.325249000  |
| 1          | 5.134410000  | -0.963276000 | -0.065865000 |
| 1          | 3.220392000  | 2.694561000  | -1.401350000 |
| 1          | 2.627755000  | 3.504611000  | -0.091864000 |
| 1          | 1.936232000  | -0.035880000 | 0.895403000  |
| 1          | 1.487711000  | 0.741448000  | -0.615838000 |
| 1          | 0.663724000  | 2.736639000  | 0.643764000  |
| 1          | 1.208332000  | 2.009676000  | 2.163360000  |
| 1          | -4.231965000 | 2.914351000  | 0.181865000  |

Table S18: Coordinates of the optimized geometry of selenenyl sulfide **1b** (RSeSG) and its corresponding selenol (RSeH) at M06-2X/6-311++g(2df,2pd) level of theory.

|                 |              |              |              |
|-----------------|--------------|--------------|--------------|
| <b>1b</b> RSeSG |              |              |              |
| 6               | -2.945805000 | -2.949385000 | 0.057848000  |
| 6               | -3.740990000 | -1.847167000 | 0.329863000  |
| 6               | -3.543213000 | -4.168216000 | -0.238959000 |
| 1               | -2.919433000 | -5.026413000 | -0.448325000 |
| 6               | -5.127885000 | -1.960603000 | 0.305067000  |
| 6               | -4.924259000 | -4.288814000 | -0.267139000 |
| 1               | -5.382912000 | -5.239499000 | -0.499148000 |
| 6               | -5.714885000 | -3.180348000 | 0.006728000  |
| 1               | -6.792874000 | -3.263525000 | -0.008930000 |
| 1               | -1.868437000 | -2.864686000 | 0.088314000  |
| 34              | -3.050868000 | -0.093385000 | 0.735640000  |
| 16              | -0.898281000 | -0.427792000 | 0.745570000  |
| 8               | 2.414942000  | -0.867418000 | -2.040017000 |
| 8               | 0.371769000  | 3.124400000  | -0.639917000 |
| 8               | 5.855395000  | 0.405778000  | 1.699110000  |
| 8               | 7.542432000  | -1.044178000 | 1.830834000  |
| 8               | -2.067417000 | 2.899121000  | 1.241267000  |
| 8               | -2.407394000 | 5.068720000  | 0.814211000  |
| 7               | 1.664549000  | 0.837503000  | -0.777327000 |
| 7               | 6.947189000  | -2.199494000 | -0.519763000 |
| 7               | -1.597937000 | 2.325078000  | -1.363593000 |
| 6               | 4.778346000  | -1.087309000 | -0.474897000 |
| 6               | 4.010025000  | 0.221613000  | -0.605379000 |
| 6               | 0.368676000  | 0.853773000  | -1.410762000 |
| 6               | 6.283350000  | -0.945308000 | -0.220810000 |
| 6               | 2.638219000  | -0.004767000 | -1.211325000 |
| 6               | -0.455849000 | -0.377068000 | -1.029908000 |
| 6               | -0.279116000 | 2.198658000  | -1.078999000 |
| 6               | 6.638943000  | -0.569348000 | 1.204017000  |
| 6               | -2.253443000 | 3.568083000  | -1.042234000 |
| 6               | -2.236157000 | 3.950240000  | 0.428586000  |
| 1               | 4.664970000  | -1.634707000 | -1.410489000 |
| 1               | 4.341560000  | -1.716987000 | 0.301805000  |
| 1               | 3.921584000  | 0.739752000  | 0.346297000  |
| 1               | 4.538854000  | 0.895101000  | -1.287476000 |
| 1               | 0.504419000  | 0.819658000  | -2.498543000 |
| 1               | 6.650640000  | -0.098374000 | -0.823277000 |
| 1               | 1.898714000  | 1.653585000  | -0.230791000 |
| 1               | -1.365542000 | -0.465121000 | -1.620971000 |
| 1               | 0.153992000  | -1.253774000 | -1.238972000 |
| 1               | 7.867227000  | -2.233452000 | -0.100427000 |
| 1               | 7.026966000  | -2.340766000 | -1.516754000 |
| 1               | -2.164262000 | 1.497506000  | -1.454275000 |
| 1               | -3.296215000 | 3.507268000  | -1.350496000 |
| 1               | -1.789781000 | 4.394368000  | -1.576380000 |
| 1               | 6.177342000  | 0.606010000  | 2.588037000  |
| 1               | -2.063985000 | 3.227948000  | 2.149924000  |
| 1               | -5.750972000 | -1.101329000 | 0.520683000  |
| <b>1b</b> RSeSH |              |              |              |
| 6               | 0.807381000  | 1.211852000  | -0.004697000 |
| 6               | 0.098784000  | 0.015847000  | 0.003985000  |

|    |              |              |              |
|----|--------------|--------------|--------------|
| 6  | 2.194537000  | 1.193278000  | -0.003929000 |
| 1  | 2.737132000  | 2.128741000  | -0.007900000 |
| 6  | 0.785477000  | -1.193706000 | 0.008851000  |
| 6  | 2.883010000  | -0.011463000 | -0.001667000 |
| 1  | 3.963635000  | -0.021257000 | -0.003010000 |
| 6  | 2.172329000  | -1.203282000 | 0.003079000  |
| 1  | 2.696977000  | -2.148824000 | 0.006211000  |
| 1  | 0.282623000  | 2.157280000  | -0.013778000 |
| 34 | -1.811322000 | -0.043016000 | -0.006139000 |
| 1  | -1.984951000 | 1.399891000  | 0.172889000  |
| 1  | 0.240416000  | -2.128438000 | 0.020565000  |

Table S19: Coordinates of the optimized geometry of selenenyl sulfide **2b** (RSeSG) and its corresponding selenol (RSeH) at M06-2X/6-311++g(2df,2pd) level of theory.

| <b>2b</b> RSeSG |              |              |              |
|-----------------|--------------|--------------|--------------|
| 6               | 2.338687000  | 2.854799000  | -0.576109000 |
| 6               | 3.119207000  | 1.882849000  | 0.031583000  |
| 6               | 2.864760000  | 4.114012000  | -0.832138000 |
| 1               | 2.245618000  | 4.863274000  | -1.305696000 |
| 6               | 4.440023000  | 2.167654000  | 0.397246000  |
| 6               | 4.174101000  | 4.404955000  | -0.485105000 |
| 1               | 4.588949000  | 5.382535000  | -0.686278000 |
| 6               | 4.951270000  | 3.430607000  | 0.124785000  |
| 1               | 5.973889000  | 3.650986000  | 0.404378000  |
| 1               | 1.311217000  | 2.641210000  | -0.834726000 |
| 6               | 5.278554000  | 1.126335000  | 1.086724000  |
| 1               | 6.290075000  | 1.513220000  | 1.264125000  |
| 1               | 4.842096000  | 0.908778000  | 2.067689000  |
| 7               | 5.261574000  | -0.116546000 | 0.334036000  |
| 1               | 5.691496000  | 0.017955000  | -0.572638000 |
| 34              | 2.437537000  | 0.106879000  | 0.394487000  |
| 1               | 5.254178000  | -1.456753000 | 1.923797000  |
| 1               | 6.886298000  | -1.047688000 | 1.366902000  |
| 6               | 5.856581000  | -1.239120000 | 1.040645000  |
| 1               | 5.837735000  | -2.123822000 | 0.409235000  |
| 16              | 0.274126000  | 0.510912000  | 0.515851000  |
| 8               | -3.240666000 | 0.606034000  | -2.094697000 |
| 8               | -0.963376000 | -3.183149000 | -0.522699000 |
| 8               | -6.364107000 | -0.445679000 | 1.979278000  |
| 8               | -8.092539000 | 0.954824000  | 2.107324000  |
| 8               | 1.614080000  | -2.860546000 | 1.198440000  |
| 8               | 3.580076000  | -3.634677000 | 0.463289000  |
| 7               | -2.341783000 | -0.957695000 | -0.748866000 |
| 7               | -7.703903000 | 1.919041000  | -0.369223000 |
| 7               | 0.927112000  | -2.369341000 | -1.454438000 |
| 6               | -5.495420000 | 0.885311000  | -0.384995000 |
| 6               | -4.690361000 | -0.405504000 | -0.462768000 |
| 6               | -1.085342000 | -0.978470000 | -1.455823000 |
| 6               | -6.972996000 | 0.718051000  | -0.012977000 |
| 6               | -3.371940000 | -0.188355000 | -1.181464000 |
| 6               | -0.284077000 | 0.304321000  | -1.213964000 |
| 6               | -0.372421000 | -2.279077000 | -1.071986000 |
| 6               | -7.216069000 | 0.456688000  | 1.460202000  |
| 6               | 1.737794000  | -3.502139000 | -1.079188000 |
| 6               | 2.435153000  | -3.342189000 | 0.260950000  |
| 1               | -5.466782000 | 1.354933000  | -1.368113000 |
| 1               | -5.029363000 | 1.591364000  | 0.304066000  |
| 1               | -4.517886000 | -0.838346000 | 0.519461000  |
| 1               | -5.239979000 | -1.149775000 | -1.047905000 |
| 1               | -1.288501000 | -1.026458000 | -2.532480000 |
| 1               | -7.347780000 | -0.189858000 | -0.513483000 |
| 1               | -2.501542000 | -1.719909000 | -0.106713000 |
| 1               | 0.578316000  | 0.376535000  | -1.875000000 |
| 1               | -0.941466000 | 1.139862000  | -1.447992000 |
| 1               | -8.596260000 | 1.956472000  | 0.105909000  |
| 1               | -7.852029000 | 1.972004000  | -1.367022000 |
| 1               | 1.413243000  | -1.524327000 | -1.707032000 |

|                |              |              |              |
|----------------|--------------|--------------|--------------|
| 1              | 2.502894000  | -3.687661000 | -1.827208000 |
| 1              | 1.085318000  | -4.372645000 | -1.009060000 |
| 1              | -6.615617000 | -0.576254000 | 2.903135000  |
| 1              | 2.119841000  | -2.751149000 | 2.014726000  |
| <b>2b RSeH</b> |              |              |              |
| 6              | 1.964926000  | -0.951187000 | 0.246526000  |
| 6              | 0.707446000  | -0.421058000 | -0.019383000 |
| 6              | 3.082825000  | -0.130446000 | 0.271753000  |
| 1              | 4.054677000  | -0.558505000 | 0.475447000  |
| 6              | 0.562775000  | 0.949782000  | -0.253423000 |
| 6              | 2.949748000  | 1.231223000  | 0.047845000  |
| 1              | 3.815572000  | 1.877667000  | 0.074081000  |
| 6              | 1.692814000  | 1.759182000  | -0.207314000 |
| 1              | 1.579342000  | 2.821525000  | -0.384152000 |
| 1              | 2.071536000  | -2.009898000 | 0.439666000  |
| 6              | -0.788972000 | 1.537550000  | -0.550407000 |
| 1              | -0.687608000 | 2.608167000  | -0.774322000 |
| 1              | -1.199551000 | 1.058143000  | -1.445336000 |
| 7              | -1.714857000 | 1.268855000  | 0.537443000  |
| 1              | -1.373605000 | 1.687924000  | 1.393388000  |
| 34             | -0.837475000 | -1.559381000 | -0.066371000 |
| 1              | -3.462953000 | 1.094582000  | -0.574020000 |
| 1              | -3.151249000 | 2.751306000  | -0.032550000 |
| 6              | -3.073061000 | 1.693264000  | 0.250484000  |
| 1              | -3.703783000 | 1.518348000  | 1.119685000  |
| 1              | -0.055231000 | -2.722154000 | -0.513869000 |

Table S20: Coordinates of the optimized geometry of selenenyl sulfide **3b** (RSeSG) and its corresponding selenol (RSeH) at M06-2X/6-311++g(2df,2pd) level of theory.

| <b>3b</b> RSeSG |              |              |              |
|-----------------|--------------|--------------|--------------|
| 6               | 2.118874000  | 2.806745000  | -0.629397000 |
| 6               | 2.893470000  | 1.888042000  | 0.065666000  |
| 6               | 2.656713000  | 4.024135000  | -1.023129000 |
| 1               | 2.038762000  | 4.729333000  | -1.561480000 |
| 6               | 4.222795000  | 2.191961000  | 0.379791000  |
| 6               | 3.976610000  | 4.328203000  | -0.731797000 |
| 1               | 4.403446000  | 5.271202000  | -1.042866000 |
| 6               | 4.747819000  | 3.410034000  | -0.034923000 |
| 1               | 5.779034000  | 3.639889000  | 0.202355000  |
| 1               | 1.084308000  | 2.586705000  | -0.849682000 |
| 6               | 5.057873000  | 1.240861000  | 1.194506000  |
| 1               | 6.104696000  | 1.581657000  | 1.209829000  |
| 1               | 4.695672000  | 1.257915000  | 2.227027000  |
| 7               | 4.943219000  | -0.126224000 | 0.720563000  |
| 6               | 5.540809000  | -0.319306000 | -0.588566000 |
| 1               | 6.628207000  | -0.150486000 | -0.571056000 |
| 1               | 5.348525000  | -1.339067000 | -0.918884000 |
| 1               | 5.097122000  | 0.373137000  | -1.303709000 |
| 34              | 2.190897000  | 0.155850000  | 0.582659000  |
| 1               | 4.906519000  | -0.973621000 | 2.626609000  |
| 1               | 6.526180000  | -0.905013000 | 1.902032000  |
| 6               | 5.459446000  | -1.073813000 | 1.691329000  |
| 1               | 5.332022000  | -2.085321000 | 1.312495000  |
| 16              | 0.021426000  | 0.571872000  | 0.559697000  |
| 8               | -3.410899000 | 0.568615000  | -2.107512000 |
| 8               | -1.054827000 | -3.148742000 | -0.454757000 |
| 8               | -6.527097000 | -0.498524000 | 1.970235000  |
| 8               | -8.269400000 | 0.885216000  | 2.092787000  |
| 8               | 1.770710000  | -2.973849000 | 1.129468000  |
| 8               | 3.689808000  | -3.328547000 | 0.034967000  |
| 7               | -2.494171000 | -0.969248000 | -0.744987000 |
| 7               | -7.887215000 | 1.847150000  | -0.385628000 |
| 7               | 0.787639000  | -2.340081000 | -1.483866000 |
| 6               | -5.668494000 | 0.835382000  | -0.395985000 |
| 6               | -4.850905000 | -0.447850000 | -0.470076000 |
| 6               | -1.231467000 | -0.968497000 | -1.438967000 |
| 6               | -7.144867000 | 0.654377000  | -0.025525000 |
| 6               | -3.533545000 | -0.218694000 | -1.186804000 |
| 6               | -0.453461000 | 0.326600000  | -1.188172000 |
| 6               | -0.495492000 | -2.252951000 | -1.048335000 |
| 6               | -7.387236000 | 0.394161000  | 1.447992000  |
| 6               | 1.615422000  | -3.481640000 | -1.175934000 |
| 6               | 2.492060000  | -3.255797000 | 0.041957000  |
| 1               | -5.643168000 | 1.303108000  | -1.380105000 |
| 1               | -5.210163000 | 1.547217000  | 0.292310000  |
| 1               | -4.676246000 | -0.877207000 | 0.513277000  |
| 1               | -5.392322000 | -1.198088000 | -1.055163000 |
| 1               | -1.423651000 | -1.020252000 | -2.517275000 |
| 1               | -7.509897000 | -0.258430000 | -0.524337000 |
| 1               | -2.637402000 | -1.716272000 | -0.081690000 |
| 1               | 0.435748000  | 0.397845000  | -1.812927000 |
| 1               | -1.109520000 | 1.150440000  | -1.464778000 |



|                |              |              |              |
|----------------|--------------|--------------|--------------|
| 1              | -8.780379000 | 1.877025000  | 0.088518000  |
| 1              | -8.034751000 | 1.896181000  | -1.383710000 |
| 1              | 1.250350000  | -1.503105000 | -1.797453000 |
| 1              | 2.267325000  | -3.715220000 | -2.012813000 |
| 1              | 0.953645000  | -4.323415000 | -0.975467000 |
| 1              | -6.777948000 | -0.628951000 | 2.894293000  |
| 1              | 2.379366000  | -2.772329000 | 1.853249000  |
| <b>3b RSeH</b> |              |              |              |
| 6              | 2.199869000  | -0.738267000 | 0.331420000  |
| 6              | 0.895080000  | -0.436906000 | -0.044089000 |
| 6              | 3.183262000  | 0.238930000  | 0.301540000  |
| 1              | 4.194104000  | -0.012024000 | 0.592067000  |
| 6              | 0.566062000  | 0.861036000  | -0.443608000 |
| 6              | 2.865962000  | 1.531544000  | -0.087714000 |
| 1              | 3.625394000  | 2.300457000  | -0.104029000 |
| 6              | 1.561706000  | 1.831733000  | -0.450607000 |
| 1              | 1.302685000  | 2.839402000  | -0.751309000 |
| 1              | 2.448549000  | -1.740470000 | 0.652907000  |
| 6              | -0.839149000 | 1.196511000  | -0.866147000 |
| 1              | -0.894097000 | 2.255752000  | -1.164700000 |
| 1              | -1.095672000 | 0.594044000  | -1.742031000 |
| 7              | -1.803193000 | 0.883562000  | 0.175876000  |
| 6              | -1.656461000 | 1.752307000  | 1.328221000  |
| 1              | -1.859330000 | 2.806201000  | 1.078105000  |
| 1              | -2.351278000 | 1.443251000  | 2.107609000  |
| 1              | -0.643524000 | 1.680944000  | 1.721929000  |
| 34             | -0.463464000 | -1.793078000 | -0.011038000 |
| 1              | -3.253406000 | 0.173239000  | -1.143544000 |
| 1              | -3.453541000 | 1.888154000  | -0.713994000 |
| 6              | -3.159316000 | 0.896965000  | -0.334123000 |
| 1              | -3.850709000 | 0.617464000  | 0.459706000  |
| 1              | 0.508855000  | -2.869832000 | -0.257901000 |

Table S21: Coordinates of the optimized geometry of selenenyl sulfide **4b** (RSeSG) and its corresponding selenol (RSeH) at M06-2X/6-311++g(2df,2pd) level of theory.

| <b>4b</b> RSeSG |              |              |              |
|-----------------|--------------|--------------|--------------|
| 6               | 1.171017000  | 3.252406000  | -0.608268000 |
| 6               | 2.062126000  | 2.280465000  | -0.182106000 |
| 6               | 1.589771000  | 4.569845000  | -0.745306000 |
| 1               | 0.886270000  | 5.320022000  | -1.078965000 |
| 6               | 3.386577000  | 2.619783000  | 0.119682000  |
| 6               | 2.899852000  | 4.917136000  | -0.459271000 |
| 1               | 3.230570000  | 5.940303000  | -0.569213000 |
| 6               | 3.788725000  | 3.940177000  | -0.031048000 |
| 1               | 4.814178000  | 4.203208000  | 0.196795000  |
| 1               | 0.143259000  | 2.990445000  | -0.817348000 |
| 6               | 4.345462000  | 1.560583000  | 0.602785000  |
| 1               | 5.335205000  | 2.005601000  | 0.760285000  |
| 1               | 3.992345000  | 1.198464000  | 1.570675000  |
| 7               | 4.311693000  | 0.450464000  | -0.332039000 |
| 1               | 4.571515000  | 0.760527000  | -1.260106000 |
| 34              | 1.542747000  | 0.426799000  | 0.024229000  |
| 6               | 4.751860000  | -1.288962000 | 1.421177000  |
| 6               | 5.846456000  | -0.733768000 | 2.339814000  |
| 6               | 7.241366000  | -0.983545000 | 1.770656000  |
| 6               | 7.353015000  | -0.414523000 | 0.358319000  |
| 6               | 6.311436000  | -1.059701000 | -0.551377000 |
| 6               | 4.872459000  | -0.878325000 | -0.049716000 |
| 1               | 3.758825000  | -1.023004000 | 1.792169000  |
| 1               | 4.804001000  | -2.380083000 | 1.439258000  |
| 1               | 5.751769000  | -1.194910000 | 3.324001000  |
| 1               | 7.997207000  | -0.546280000 | 2.423989000  |
| 1               | 7.434348000  | -2.060255000 | 1.735540000  |
| 1               | 8.353133000  | -0.580757000 | -0.043870000 |
| 1               | 7.202968000  | 0.668845000  | 0.388192000  |
| 1               | 6.386800000  | -0.672390000 | -1.570446000 |
| 1               | 6.513395000  | -2.133671000 | -0.610536000 |
| 1               | 4.247372000  | -1.575568000 | -0.615139000 |
| 1               | 5.722810000  | 0.340015000  | 2.489846000  |
| 16              | -0.631281000 | 0.638302000  | 0.342466000  |
| 8               | -4.335655000 | 0.608629000  | -2.006605000 |
| 8               | -1.705491000 | -3.082473000 | -0.802574000 |
| 8               | -7.087174000 | -0.880413000 | 2.201994000  |
| 8               | -8.879223000 | 0.399704000  | 2.541223000  |
| 8               | 0.942878000  | -2.599971000 | 0.762424000  |
| 8               | 2.760258000  | -3.637270000 | -0.025842000 |
| 7               | -3.237265000 | -0.945128000 | -0.804516000 |
| 7               | -8.721734000 | 1.545253000  | 0.116846000  |
| 7               | 0.065672000  | -2.087069000 | -1.785576000 |
| 6               | -6.464494000 | 0.653421000  | -0.117371000 |
| 6               | -5.592321000 | -0.576884000 | -0.332992000 |
| 6               | -2.036206000 | -0.844586000 | -1.596514000 |
| 6               | -7.900044000 | 0.371171000  | 0.339976000  |
| 6               | -4.346178000 | -0.233548000 | -1.127526000 |
| 6               | -1.309257000 | 0.480649000  | -1.348892000 |
| 6               | -1.212393000 | -2.108099000 | -1.328746000 |
| 6               | -8.023500000 | -0.000139000 | 1.804361000  |
| 6               | 0.954816000  | -3.193771000 | -1.541279000 |

|                |              |              |              |
|----------------|--------------|--------------|--------------|
| 6              | 1.669977000  | -3.168364000 | -0.200755000 |
| 1              | -6.532730000 | 1.183004000  | -1.067555000 |
| 1              | -5.993599000 | 1.343897000  | 0.584095000  |
| 1              | -5.323044000 | -1.055113000 | 0.605372000  |
| 1              | -6.138611000 | -1.318313000 | -0.924746000 |
| 1              | -2.313021000 | -0.860641000 | -2.657697000 |
| 1              | -8.256413000 | -0.523752000 | -0.196090000 |
| 1              | -3.300883000 | -1.747205000 | -0.195217000 |
| 1              | -0.507326000 | 0.644909000  | -2.067068000 |
| 1              | -2.038382000 | 1.276273000  | -1.490331000 |
| 1              | -9.579435000 | 1.496341000  | 0.651058000  |
| 1              | -8.941871000 | 1.654065000  | -0.862967000 |
| 1              | 0.485573000  | -1.197998000 | -2.004277000 |
| 1              | 1.717459000  | -3.247164000 | -2.313302000 |
| 1              | 0.370037000  | -4.113884000 | -1.567783000 |
| 1              | -7.265752000 | -1.086588000 | 3.129050000  |
| 1              | 1.462681000  | -2.611158000 | 1.577508000  |
| <b>4b RSeH</b> |              |              |              |
| 6              | 3.468359000  | 0.210472000  | 0.104811000  |
| 6              | 2.109986000  | -0.043570000 | -0.042294000 |
| 6              | 3.947196000  | 1.512431000  | 0.075425000  |
| 1              | 5.007202000  | 1.693838000  | 0.188183000  |
| 6              | 1.214953000  | 1.016800000  | -0.213885000 |
| 6              | 3.067992000  | 2.571623000  | -0.085798000 |
| 1              | 3.433107000  | 3.588870000  | -0.100353000 |
| 6              | 1.711371000  | 2.315302000  | -0.224075000 |
| 1              | 1.016750000  | 3.136460000  | -0.350764000 |
| 1              | 4.156508000  | -0.611439000 | 0.248361000  |
| 6              | -0.259474000 | 0.756585000  | -0.389946000 |
| 1              | -0.769392000 | 1.710495000  | -0.575774000 |
| 1              | -0.389738000 | 0.138128000  | -1.280704000 |
| 7              | -0.751135000 | 0.012015000  | 0.753595000  |
| 1              | -0.562440000 | 0.511314000  | 1.613090000  |
| 34             | 1.447465000  | -1.844979000 | -0.009026000 |
| 6              | -2.561474000 | -1.105374000 | -0.574615000 |
| 6              | -3.190512000 | -0.019705000 | -1.455475000 |
| 6              | -4.248836000 | 0.780085000  | -0.698260000 |
| 6              | -3.668082000 | 1.358181000  | 0.590100000  |
| 6              | -3.144293000 | 0.235519000  | 1.481002000  |
| 6              | -2.072342000 | -0.624171000 | 0.796022000  |
| 1              | -1.748197000 | -1.613492000 | -1.096001000 |
| 1              | -3.324724000 | -1.864157000 | -0.382269000 |
| 1              | -3.631258000 | -0.489377000 | -2.336167000 |
| 1              | -4.645629000 | 1.573394000  | -1.332910000 |
| 1              | -5.088961000 | 0.125609000  | -0.444810000 |
| 1              | -4.422778000 | 1.937562000  | 1.123578000  |
| 1              | -2.855328000 | 2.049132000  | 0.347804000  |
| 1              | -2.740597000 | 0.632502000  | 2.415517000  |
| 1              | -3.980823000 | -0.415640000 | 1.754891000  |
| 1              | -1.939532000 | -1.519347000 | 1.411434000  |
| 1              | -2.430958000 | 0.670844000  | -1.824063000 |
| 1              | 2.711854000  | -2.394601000 | -0.525383000 |

Table S22: Coordinates of the optimized geometry of selenenyl sulfide **5b** (RSeSG) and its corresponding selenol (RSeH) at M06-2X/6-311++g(2df,2pd) level of theory.

| <b>5b</b> RSeSG |              |              |              |
|-----------------|--------------|--------------|--------------|
| 6               | 1.081027000  | 3.339599000  | -0.318912000 |
| 6               | 1.984447000  | 2.333246000  | -0.013520000 |
| 6               | 1.509178000  | 4.657398000  | -0.414956000 |
| 1               | 0.794509000  | 5.433019000  | -0.652974000 |
| 6               | 3.334220000  | 2.638888000  | 0.196614000  |
| 6               | 2.842706000  | 4.972130000  | -0.211865000 |
| 1               | 3.181806000  | 5.995405000  | -0.290848000 |
| 6               | 3.744995000  | 3.960303000  | 0.086768000  |
| 1               | 4.791121000  | 4.195744000  | 0.238543000  |
| 1               | 0.037035000  | 3.100880000  | -0.465157000 |
| 6               | 4.320946000  | 1.547107000  | 0.546155000  |
| 1               | 5.339432000  | 1.961691000  | 0.526188000  |
| 1               | 4.112176000  | 1.229379000  | 1.566760000  |
| 7               | 4.139223000  | 0.409075000  | -0.331892000 |
| 6               | 4.369724000  | 0.714186000  | -1.728928000 |
| 1               | 5.413830000  | 0.976395000  | -1.946735000 |
| 1               | 4.101951000  | -0.151940000 | -2.335405000 |
| 1               | 3.742686000  | 1.551214000  | -2.035375000 |
| 34              | 1.453355000  | 0.476278000  | 0.130749000  |
| 6               | 4.387497000  | -1.264121000 | 1.546522000  |
| 6               | 5.551679000  | -0.826226000 | 2.446323000  |
| 6               | 6.904005000  | -1.268897000 | 1.893477000  |
| 6               | 7.070103000  | -0.797794000 | 0.451524000  |
| 6               | 5.953518000  | -1.372891000 | -0.414091000 |
| 6               | 4.549859000  | -0.952849000 | 0.052704000  |
| 1               | 3.443634000  | -0.852837000 | 1.909861000  |
| 1               | 4.298798000  | -2.352047000 | 1.612061000  |
| 1               | 5.397859000  | -1.239003000 | 3.444433000  |
| 1               | 7.708421000  | -0.887152000 | 2.523166000  |
| 1               | 6.970681000  | -2.360857000 | 1.916813000  |
| 1               | 8.041206000  | -1.101525000 | 0.058679000  |
| 1               | 7.043999000  | 0.296167000  | 0.416850000  |
| 1               | 6.098273000  | -1.115444000 | -1.462707000 |
| 1               | 5.994518000  | -2.464894000 | -0.358624000 |
| 1               | 3.842156000  | -1.601119000 | -0.478102000 |
| 1               | 5.570768000  | 0.258379000  | 2.563994000  |
| 16              | -0.732025000 | 0.677552000  | 0.408939000  |
| 8               | -4.385408000 | 0.649533000  | -2.009546000 |
| 8               | -1.736794000 | -3.040805000 | -0.855708000 |
| 8               | -7.172803000 | -0.934969000 | 2.135240000  |
| 8               | -8.995506000 | 0.305069000  | 2.459395000  |
| 8               | 0.865425000  | -2.560358000 | 0.776756000  |
| 8               | 2.545707000  | -3.849512000 | 0.060648000  |
| 7               | -3.288392000 | -0.915594000 | -0.820828000 |
| 7               | -8.828188000 | 1.472871000  | 0.046301000  |
| 7               | 0.046764000  | -1.998828000 | -1.760582000 |
| 6               | -6.551371000 | 0.625343000  | -0.165287000 |
| 6               | -5.655930000 | -0.587421000 | -0.384346000 |
| 6               | -2.074426000 | -0.782785000 | -1.588269000 |
| 6               | -7.987157000 | 0.312860000  | 0.271212000  |
| 6               | -4.400539000 | -0.211377000 | -1.148947000 |
| 6               | -1.369512000 | 0.546102000  | -1.299492000 |

|                |              |              |              |
|----------------|--------------|--------------|--------------|
| 6              | -1.242067000 | -2.044063000 | -1.337389000 |
| 6              | -8.122027000 | -0.071631000 | 1.731204000  |
| 6              | 0.927203000  | -3.116555000 | -1.542617000 |
| 6              | 1.548988000  | -3.218850000 | -0.159237000 |
| 1              | -6.616982000 | 1.165265000  | -1.109785000 |
| 1              | -6.100633000 | 1.315215000  | 0.549879000  |
| 1              | -5.396622000 | -1.076742000 | 0.551148000  |
| 1              | -6.179240000 | -1.327328000 | -0.998369000 |
| 1              | -2.332379000 | -0.778506000 | -2.654402000 |
| 1              | -8.319878000 | -0.584561000 | -0.275782000 |
| 1              | -3.353846000 | -1.732173000 | -0.231421000 |
| 1              | -0.553614000 | 0.733630000  | -1.996083000 |
| 1              | -2.105076000 | 1.335310000  | -1.442841000 |
| 1              | -9.691079000 | 1.403935000  | 0.569858000  |
| 1              | -9.038753000 | 1.584443000  | -0.935301000 |
| 1              | 0.471216000  | -1.099810000 | -1.923715000 |
| 1              | 1.744536000  | -3.098018000 | -2.259355000 |
| 1              | 0.365048000  | -4.038377000 | -1.694803000 |
| 1              | -7.358945000 | -1.150998000 | 3.058553000  |
| 1              | 1.326504000  | -2.671580000 | 1.619325000  |
| <b>5b RSeH</b> |              |              |              |
| 6              | 3.407368000  | -0.304994000 | -0.239563000 |
| 6              | 2.018044000  | -0.282066000 | -0.172444000 |
| 6              | 4.119371000  | 0.860360000  | -0.477897000 |
| 1              | 5.198695000  | 0.825406000  | -0.532542000 |
| 6              | 1.328915000  | 0.922559000  | -0.330013000 |
| 6              | 3.446780000  | 2.062906000  | -0.634202000 |
| 1              | 3.994343000  | 2.977699000  | -0.812021000 |
| 6              | 2.062919000  | 2.083170000  | -0.553596000 |
| 1              | 1.530142000  | 3.019239000  | -0.667158000 |
| 1              | 3.936208000  | -1.238300000 | -0.102163000 |
| 6              | -0.177619000 | 0.977808000  | -0.272469000 |
| 1              | -0.493617000 | 2.009805000  | -0.488322000 |
| 1              | -0.574626000 | 0.338993000  | -1.060554000 |
| 7              | -0.695715000 | 0.507587000  | 1.005591000  |
| 6              | -0.249762000 | 1.374486000  | 2.085823000  |
| 1              | -0.636146000 | 2.401898000  | 1.996993000  |
| 1              | -0.572877000 | 0.965350000  | 3.041117000  |
| 1              | 0.837700000  | 1.427478000  | 2.091644000  |
| 34             | 1.039879000  | -1.901809000 | 0.142003000  |
| 6              | -2.582899000 | -1.095377000 | 0.510940000  |
| 6              | -2.857733000 | -1.155879000 | -0.991648000 |
| 6              | -3.837745000 | -0.060033000 | -1.404525000 |
| 6              | -3.318314000 | 1.320247000  | -1.007175000 |
| 6              | -3.036731000 | 1.403064000  | 0.497123000  |
| 6              | -2.152003000 | 0.272110000  | 1.064273000  |
| 1              | -1.845696000 | -1.840077000 | 0.807612000  |
| 1              | -3.517594000 | -1.354369000 | 1.018839000  |
| 1              | -3.267309000 | -2.137065000 | -1.237528000 |
| 1              | -4.025641000 | -0.097845000 | -2.478254000 |
| 1              | -4.797635000 | -0.237125000 | -0.908192000 |
| 1              | -4.049302000 | 2.085801000  | -1.273116000 |
| 1              | -2.419680000 | 1.541964000  | -1.584214000 |
| 1              | -2.605346000 | 2.373613000  | 0.753326000  |
| 1              | -3.997956000 | 1.351975000  | 1.016705000  |
| 1              | -2.355552000 | 0.227355000  | 2.135009000  |

|   |              |              |              |
|---|--------------|--------------|--------------|
| 1 | -1.931753000 | -1.065808000 | -1.562553000 |
| 1 | 2.084210000  | -2.737767000 | -0.469612000 |

Table S23: Coordinates of the optimized geometry of selenenyl sulfide **6b** (RSeSG) and its corresponding selenol (RSeH) at M06-2X/6-311++g(2df,2pd) level of theory.

| <b>6b</b> RSeSG |              |              |              |
|-----------------|--------------|--------------|--------------|
| 7               | 1.492668000  | -1.802761000 | -1.686110000 |
| 6               | 2.022478000  | -3.135037000 | -1.768701000 |
| 6               | 3.459074000  | -3.130423000 | -1.320308000 |
| 8               | 4.051622000  | -2.164723000 | -0.923814000 |
| 8               | 4.005482000  | -4.345268000 | -1.418500000 |
| 6               | 0.153775000  | -1.606053000 | -1.673983000 |
| 8               | -0.646475000 | -2.491439000 | -1.880581000 |
| 6               | -0.321499000 | -0.164088000 | -1.467419000 |
| 7               | 0.651238000  | 0.655665000  | -0.778045000 |
| 6               | -0.663318000 | 0.408812000  | -2.838912000 |
| 16              | -1.205608000 | 2.150984000  | -2.837222000 |
| 6               | 4.584360000  | 1.376696000  | 1.482487000  |
| 6               | 5.849004000  | 0.630924000  | 1.115159000  |
| 8               | 6.599507000  | 0.957706000  | 0.240686000  |
| 8               | 6.006956000  | -0.483131000 | 1.844056000  |
| 7               | 4.768878000  | 2.768169000  | 1.128634000  |
| 6               | 3.423411000  | 0.642104000  | 0.784777000  |
| 6               | 2.059471000  | 1.257397000  | 1.112353000  |
| 6               | 0.985275000  | 0.384914000  | 0.510907000  |
| 8               | 0.527973000  | -0.583150000 | 1.098173000  |
| 1               | 2.120599000  | -1.077401000 | -1.375060000 |
| 1               | 1.454326000  | -3.820843000 | -1.135542000 |
| 1               | 1.972655000  | -3.538991000 | -2.782103000 |
| 1               | 4.922619000  | -4.287458000 | -1.120188000 |
| 1               | -1.237788000 | -0.248538000 | -0.879786000 |
| 1               | 0.846991000  | 1.572771000  | -1.152055000 |
| 1               | -1.431773000 | -0.215012000 | -3.287954000 |
| 1               | 0.215404000  | 0.400482000  | -3.488554000 |
| 1               | 4.444353000  | 1.290040000  | 2.562191000  |
| 1               | 6.782543000  | -0.946784000 | 1.502412000  |
| 1               | 5.195739000  | 2.845279000  | 0.213039000  |
| 1               | 3.899949000  | 3.282477000  | 1.138350000  |
| 1               | 3.425376000  | -0.405250000 | 1.091441000  |
| 1               | 3.597679000  | 0.665265000  | -0.294877000 |
| 1               | 1.981566000  | 2.275024000  | 0.727059000  |
| 1               | 1.901051000  | 1.278622000  | 2.189726000  |
| 6               | -1.140995000 | 3.599372000  | 0.257732000  |
| 6               | -1.965489000 | 2.482282000  | 0.179827000  |
| 6               | -0.431720000 | 3.863170000  | 1.419287000  |
| 1               | 0.192163000  | 4.745073000  | 1.477072000  |
| 6               | -2.077715000 | 1.625865000  | 1.272292000  |
| 6               | -0.534028000 | 3.006492000  | 2.508443000  |
| 1               | 0.013400000  | 3.213216000  | 3.417762000  |
| 6               | -1.347698000 | 1.888130000  | 2.429208000  |
| 1               | -1.431614000 | 1.211493000  | 3.269696000  |
| 1               | -1.057244000 | 4.261730000  | -0.593294000 |
| 6               | -3.024671000 | 0.457061000  | 1.221282000  |
| 8               | -4.195646000 | 0.625362000  | 0.949459000  |
| 7               | -2.434432000 | -0.735492000 | 1.495526000  |
| 1               | -1.420579000 | -0.733136000 | 1.538990000  |
| 6               | -3.033833000 | -2.011185000 | 1.476251000  |
| 6               | -4.406992000 | -2.207590000 | 1.594957000  |

|                |              |              |              |
|----------------|--------------|--------------|--------------|
| 6              | -2.179763000 | -3.105928000 | 1.352420000  |
| 1              | -5.067500000 | -1.361153000 | 1.680164000  |
| 1              | -1.115958000 | -2.934567000 | 1.242086000  |
| 6              | -4.906290000 | -3.502819000 | 1.590883000  |
| 6              | -2.693444000 | -4.389964000 | 1.351761000  |
| 1              | -5.973369000 | -3.652605000 | 1.681929000  |
| 1              | -2.022951000 | -5.231841000 | 1.248908000  |
| 6              | -4.061782000 | -4.595966000 | 1.471281000  |
| 1              | -4.464610000 | -5.598869000 | 1.466870000  |
| 34             | -2.914199000 | 2.106715000  | -1.462073000 |
| <b>6b RSeH</b> |              |              |              |
| 6              | -3.497919000 | 0.841526000  | -0.139360000 |
| 6              | -2.309748000 | 0.118585000  | -0.036688000 |
| 6              | -3.513451000 | 2.215905000  | 0.019380000  |
| 1              | -4.450709000 | 2.749201000  | -0.060502000 |
| 6              | -1.119827000 | 0.812508000  | 0.211766000  |
| 6              | -2.339436000 | 2.902586000  | 0.297154000  |
| 1              | -2.349422000 | 3.972101000  | 0.449193000  |
| 6              | -1.154507000 | 2.196182000  | 0.389198000  |
| 1              | -0.243249000 | 2.723577000  | 0.640003000  |
| 1              | -4.424153000 | 0.320165000  | -0.336007000 |
| 6              | 0.168606000  | 0.057614000  | 0.330273000  |
| 8              | 0.196061000  | -1.078809000 | 0.755733000  |
| 7              | 1.277020000  | 0.743763000  | -0.081301000 |
| 1              | 1.106733000  | 1.620191000  | -0.545599000 |
| 6              | 2.621415000  | 0.329570000  | -0.061323000 |
| 6              | 3.057447000  | -0.841000000 | 0.556756000  |
| 6              | 3.548820000  | 1.165042000  | -0.685859000 |
| 1              | 2.348681000  | -1.493966000 | 1.035476000  |
| 1              | 3.208852000  | 2.074374000  | -1.166696000 |
| 6              | 4.410366000  | -1.152121000 | 0.538365000  |
| 6              | 4.892863000  | 0.840116000  | -0.695513000 |
| 1              | 4.740490000  | -2.062378000 | 1.019779000  |
| 1              | 5.596113000  | 1.499509000  | -1.184896000 |
| 6              | 5.333537000  | -0.324740000 | -0.081656000 |
| 1              | 6.382866000  | -0.582430000 | -0.088223000 |
| 34             | -2.333322000 | -1.782806000 | -0.242944000 |
| 1              | -3.679870000 | -1.751441000 | -0.834137000 |



Table S24: Coordinates of the optimized geometry of selenenyl sulfide **7b** (RSeSG) and its corresponding selenol (RSeH) at M06-2X/6-311++g(2df,2pd) level of theory.

| <b>7b</b> RSeSG |              |              |              |
|-----------------|--------------|--------------|--------------|
| 7               | 1.011649000  | 2.190692000  | 1.737822000  |
| 6               | 1.007098000  | 3.621802000  | 1.854415000  |
| 6               | 2.334328000  | 4.163712000  | 1.396082000  |
| 8               | 3.237590000  | 3.497797000  | 0.970597000  |
| 8               | 2.389588000  | 5.492499000  | 1.521989000  |
| 6               | -0.155827000 | 1.506762000  | 1.719297000  |
| 8               | -1.227597000 | 2.021893000  | 1.952888000  |
| 6               | -0.051594000 | -0.000575000 | 1.466852000  |
| 7               | 1.138343000  | -0.357994000 | 0.725560000  |
| 6               | -0.095891000 | -0.699787000 | 2.822732000  |
| 16              | 0.181288000  | -2.500488000 | 2.775844000  |
| 6               | 4.978937000  | 0.447772000  | -1.636336000 |
| 6               | 5.917579000  | 1.568427000  | -1.245109000 |
| 8               | 6.762083000  | 1.482704000  | -0.399939000 |
| 8               | 5.656552000  | 2.701318000  | -1.913192000 |
| 7               | 5.644966000  | -0.807827000 | -1.361951000 |
| 6               | 3.657070000  | 0.698682000  | -0.884902000 |
| 6               | 2.584378000  | -0.338866000 | -1.228899000 |
| 6               | 1.292987000  | 0.059706000  | -0.558736000 |
| 8               | 0.484456000  | 0.806316000  | -1.087265000 |
| 1               | 1.859739000  | 1.760685000  | 1.400976000  |
| 1               | 0.214634000  | 4.060478000  | 1.243251000  |
| 1               | 0.826944000  | 3.954797000  | 2.878764000  |
| 1               | 3.256923000  | 5.787481000  | 1.215024000  |
| 1               | -0.949352000 | -0.261984000 | 0.903373000  |
| 1               | 1.671257000  | -1.152628000 | 1.049005000  |
| 1               | -1.052232000 | -0.481183000 | 3.290406000  |
| 1               | 0.701253000  | -0.328828000 | 3.471696000  |
| 1               | 4.784266000  | 0.530759000  | -2.707793000 |
| 1               | 6.235558000  | 3.388295000  | -1.558147000 |
| 1               | 6.097822000  | -0.776367000 | -0.456208000 |
| 1               | 5.008474000  | -1.591239000 | -1.392508000 |
| 1               | 3.285402000  | 1.693815000  | -1.135389000 |
| 1               | 3.861245000  | 0.688135000  | 0.189637000  |
| 1               | 2.881908000  | -1.338264000 | -0.907403000 |
| 1               | 2.404419000  | -0.358294000 | -2.302824000 |
| 6               | 0.731142000  | -3.895255000 | -0.454611000 |
| 6               | -0.439726000 | -3.149977000 | -0.262475000 |
| 6               | 1.387712000  | -3.775476000 | -1.680151000 |
| 1               | 2.284177000  | -4.359922000 | -1.846331000 |
| 6               | -0.944250000 | -2.346574000 | -1.288553000 |
| 6               | 0.912354000  | -2.950531000 | -2.685913000 |
| 1               | 1.441163000  | -2.882289000 | -3.626882000 |
| 6               | -0.257292000 | -2.234183000 | -2.491134000 |
| 1               | -0.656414000 | -1.603094000 | -3.274059000 |
| 6               | -2.287416000 | -1.680367000 | -1.141453000 |
| 8               | -3.268120000 | -2.336611000 | -0.852430000 |
| 7               | -2.273664000 | -0.344231000 | -1.373379000 |
| 1               | -1.362940000 | 0.095182000  | -1.452400000 |
| 6               | -3.369246000 | 0.539291000  | -1.236505000 |
| 6               | -4.690115000 | 0.142218000  | -1.445491000 |
| 6               | -3.097033000 | 1.856173000  | -0.899667000 |

|                |              |              |              |
|----------------|--------------|--------------|--------------|
| 1              | -4.911644000 | -0.882199000 | -1.696703000 |
| 1              | -2.072984000 | 2.155682000  | -0.715335000 |
| 6              | -5.708976000 | 1.064456000  | -1.314511000 |
| 6              | -4.120500000 | 2.785192000  | -0.771409000 |
| 1              | -6.738853000 | 0.775172000  | -1.468863000 |
| 1              | -3.876102000 | 3.799824000  | -0.497819000 |
| 6              | -5.436088000 | 2.388499000  | -0.977987000 |
| 34             | -1.398664000 | -3.203800000 | 1.419352000  |
| 6              | 1.291397000  | -4.829031000 | 0.582337000  |
| 1              | 1.838286000  | -4.287698000 | 1.354607000  |
| 1              | 0.496097000  | -5.379954000 | 1.082201000  |
| 1              | 1.973233000  | -5.538312000 | 0.118029000  |
| 8              | -6.511586000 | 3.212767000  | -0.872142000 |
| 6              | -6.273348000 | 4.551912000  | -0.510778000 |
| 1              | -5.794853000 | 4.618485000  | 0.469261000  |
| 1              | -5.647637000 | 5.056975000  | -1.250849000 |
| 1              | -7.244655000 | 5.035683000  | -0.471165000 |
| <b>7b RSeH</b> |              |              |              |
| 6              | -4.022747000 | 0.749830000  | -0.151165000 |
| 6              | -2.794499000 | 0.082901000  | -0.024805000 |
| 6              | -4.053790000 | 2.129861000  | 0.034741000  |
| 1              | -5.003391000 | 2.641155000  | -0.056669000 |
| 6              | -1.640428000 | 0.812948000  | 0.287293000  |
| 6              | -2.916819000 | 2.853428000  | 0.349876000  |
| 1              | -2.974340000 | 3.920542000  | 0.509929000  |
| 6              | -1.710504000 | 2.189415000  | 0.477942000  |
| 1              | -0.820097000 | 2.734256000  | 0.763307000  |
| 6              | -0.331434000 | 0.106973000  | 0.488649000  |
| 8              | -0.268038000 | -0.956503000 | 1.070854000  |
| 7              | 0.747226000  | 0.765715000  | -0.024580000 |
| 1              | 0.541237000  | 1.576322000  | -0.584737000 |
| 6              | 2.106631000  | 0.395519000  | 0.028214000  |
| 6              | 2.589564000  | -0.659785000 | 0.806459000  |
| 6              | 3.004269000  | 1.141110000  | -0.724152000 |
| 1              | 1.907747000  | -1.252859000 | 1.391344000  |
| 1              | 2.640937000  | 1.960443000  | -1.332588000 |
| 6              | 3.941655000  | -0.940435000 | 0.813628000  |
| 6              | 4.363386000  | 0.859388000  | -0.716225000 |
| 1              | 4.327958000  | -1.754695000 | 1.410359000  |
| 1              | 5.027987000  | 1.462426000  | -1.315364000 |
| 6              | 4.839821000  | -0.191215000 | 0.058369000  |
| 34             | -2.648193000 | -1.816597000 | -0.264844000 |
| 6              | -5.305878000 | 0.033800000  | -0.463309000 |
| 1              | -5.311798000 | -0.350720000 | -1.485077000 |
| 1              | -5.452748000 | -0.814880000 | 0.205033000  |
| 1              | -6.150983000 | 0.710197000  | -0.358996000 |
| 8              | 6.145334000  | -0.555282000 | 0.139816000  |
| 6              | 7.077201000  | 0.182026000  | -0.615034000 |
| 1              | 6.861145000  | 0.116521000  | -1.684175000 |
| 1              | 7.088541000  | 1.232360000  | -0.313754000 |
| 1              | 8.049136000  | -0.259239000 | -0.416943000 |
| 1              | -3.820282000 | -1.897821000 | -1.143149000 |

Table S25: Coordinates of the optimized geometry of selenenyl sulfide **8b** (RSeSG) and its corresponding selenol (RSeH) at M06-2X/6-311++g(2df,2pd) level of theory.

| <b>8b</b> RSeSG |              |              |              |
|-----------------|--------------|--------------|--------------|
| 7               | 0.787234000  | 2.414288000  | 1.972592000  |
| 6               | 0.940461000  | 3.838794000  | 1.859655000  |
| 6               | 2.278219000  | 4.159531000  | 1.246424000  |
| 8               | 3.111306000  | 3.346728000  | 0.953062000  |
| 8               | 2.451379000  | 5.477316000  | 1.110810000  |
| 6               | -0.426765000 | 1.842630000  | 1.760164000  |
| 8               | -1.460261000 | 2.469762000  | 1.715032000  |
| 6               | -0.438565000 | 0.313011000  | 1.696363000  |
| 7               | 0.797846000  | -0.229044000 | 1.169029000  |
| 6               | -0.722087000 | -0.208820000 | 3.101897000  |
| 16              | -0.719856000 | -2.024535000 | 3.274217000  |
| 6               | 4.874988000  | -0.108461000 | -1.115110000 |
| 6               | 5.939240000  | 0.964593000  | -0.992823000 |
| 8               | 6.895467000  | 0.907448000  | -0.272165000 |
| 8               | 5.702719000  | 1.995956000  | -1.815391000 |
| 7               | 5.386211000  | -1.341575000 | -0.543055000 |
| 6               | 3.586111000  | 0.423878000  | -0.471002000 |
| 6               | 2.440851000  | -0.583186000 | -0.600998000 |
| 6               | 1.155346000  | 0.043400000  | -0.116210000 |
| 8               | 0.526910000  | 0.837351000  | -0.796721000 |
| 1               | 1.615434000  | 1.863295000  | 1.800269000  |
| 1               | 0.141700000  | 4.253881000  | 1.242575000  |
| 1               | 0.886951000  | 4.347698000  | 2.825231000  |
| 1               | 3.327840000  | 5.627641000  | 0.733063000  |
| 1               | -1.279223000 | 0.064720000  | 1.044972000  |
| 1               | 1.148100000  | -1.072830000 | 1.600904000  |
| 1               | -1.676026000 | 0.193484000  | 3.433186000  |
| 1               | 0.057830000  | 0.123037000  | 3.791520000  |
| 1               | 4.690488000  | -0.227325000 | -2.187506000 |
| 1               | 6.396549000  | 2.651875000  | -1.669773000 |
| 1               | 6.164229000  | -1.132794000 | 0.072391000  |
| 1               | 4.684162000  | -1.826225000 | -0.002877000 |
| 1               | 3.289527000  | 1.349253000  | -0.964744000 |
| 1               | 3.777504000  | 0.661027000  | 0.578665000  |
| 1               | 2.637188000  | -1.502161000 | -0.046311000 |
| 1               | 2.299180000  | -0.840657000 | -1.651155000 |
| 6               | -0.001234000 | -3.710007000 | 0.394012000  |
| 6               | -1.117416000 | -2.894707000 | 0.296269000  |
| 6               | 0.887862000  | -3.843055000 | -0.665307000 |
| 1               | 1.756540000  | -4.474330000 | -0.553846000 |
| 6               | -1.358160000 | -2.208837000 | -0.896200000 |
| 6               | 0.658759000  | -3.135816000 | -1.841675000 |
| 6               | -0.464373000 | -2.319312000 | -1.948874000 |
| 1               | 0.185445000  | -4.253694000 | 1.310311000  |
| 6               | -2.596475000 | -1.364269000 | -1.037809000 |
| 8               | -3.686966000 | -1.822914000 | -0.766155000 |
| 7               | -2.355595000 | -0.096468000 | -1.462028000 |
| 1               | -1.384290000 | 0.191361000  | -1.498140000 |
| 6               | -3.299449000 | 0.946363000  | -1.583067000 |
| 6               | -4.649279000 | 0.720878000  | -1.823231000 |
| 6               | -2.826455000 | 2.252149000  | -1.470277000 |
| 1               | -5.023418000 | -0.286600000 | -1.901347000 |

|                |              |              |              |
|----------------|--------------|--------------|--------------|
| 1              | -1.778366000 | 2.417542000  | -1.253494000 |
| 6              | -5.505181000 | 1.806662000  | -1.953919000 |
| 6              | -3.695092000 | 3.317482000  | -1.605431000 |
| 1              | -6.555276000 | 1.622574000  | -2.143043000 |
| 1              | -3.316024000 | 4.326708000  | -1.502265000 |
| 6              | -5.052663000 | 3.115718000  | -1.848710000 |
| 34             | -2.257066000 | -2.656621000 | 1.837806000  |
| 6              | -5.991980000 | 4.284610000  | -1.968380000 |
| 1              | -6.119585000 | 4.781965000  | -1.005730000 |
| 1              | -5.610001000 | 5.025502000  | -2.670819000 |
| 1              | -6.974097000 | 3.965796000  | -2.312485000 |
| 1              | -0.621523000 | -1.765884000 | -2.865316000 |
| 8              | 1.462263000  | -3.184620000 | -2.929082000 |
| 6              | 2.722345000  | -3.806700000 | -2.796277000 |
| 1              | 3.328588000  | -3.319368000 | -2.027605000 |
| 1              | 2.625091000  | -4.868089000 | -2.560125000 |
| 1              | 3.216983000  | -3.705528000 | -3.757184000 |
| <b>8b RSeH</b> |              |              |              |
| 6              | -3.535389000 | -0.436090000 | -0.231607000 |
| 6              | -2.221756000 | -0.859613000 | -0.080879000 |
| 6              | -3.890455000 | 0.902842000  | -0.142891000 |
| 1              | -4.926675000 | 1.179967000  | -0.262988000 |
| 6              | -1.239490000 | 0.110737000  | 0.155995000  |
| 6              | -2.914198000 | 1.857301000  | 0.115446000  |
| 6              | -1.594164000 | 1.448861000  | 0.261786000  |
| 1              | -4.312983000 | -1.164224000 | -0.416249000 |
| 6              | 0.188878000  | -0.308834000 | 0.341061000  |
| 8              | 0.468229000  | -1.370801000 | 0.858143000  |
| 7              | 1.112282000  | 0.584558000  | -0.119571000 |
| 1              | 0.749285000  | 1.365505000  | -0.640501000 |
| 6              | 2.516358000  | 0.495719000  | -0.069915000 |
| 6              | 3.204782000  | -0.498455000 | 0.618200000  |
| 6              | 3.239460000  | 1.482538000  | -0.742020000 |
| 1              | 2.663061000  | -1.268385000 | 1.139724000  |
| 1              | 2.710021000  | 2.261282000  | -1.277876000 |
| 6              | 4.594086000  | -0.486077000 | 0.618629000  |
| 6              | 4.620292000  | 1.475061000  | -0.727982000 |
| 1              | 5.116973000  | -1.265062000 | 1.159125000  |
| 1              | 5.159657000  | 2.251792000  | -1.255835000 |
| 6              | 5.328199000  | 0.486274000  | -0.046917000 |
| 34             | -1.785339000 | -2.721182000 | -0.207184000 |
| 6              | 6.832153000  | 0.475417000  | -0.052517000 |
| 1              | 7.216956000  | 0.219342000  | -1.040745000 |
| 1              | 7.233075000  | 1.454320000  | 0.210208000  |
| 1              | 7.221813000  | -0.252351000 | 0.656504000  |
| 1              | -0.857794000 | 2.204697000  | 0.500780000  |
| 8              | -3.148063000 | 3.185556000  | 0.247180000  |
| 6              | -4.480713000 | 3.630636000  | 0.127541000  |
| 1              | -4.884359000 | 3.406371000  | -0.862357000 |
| 1              | -5.117710000 | 3.176747000  | 0.889861000  |
| 1              | -4.456380000 | 4.706161000  | 0.271389000  |
| 1              | -3.048984000 | -3.023805000 | -0.895972000 |

Table S26: Coordinates of the optimized geometry of selenenyl sulfide **9b** (RSeSG) and its corresponding selenol (RSeH) at M06-2X/6-311++g(2df,2pd) level of theory.

| <b>9b</b> RSeSG |              |              |              |
|-----------------|--------------|--------------|--------------|
| 6               | -2.674860000 | -2.613589000 | -0.620003000 |
| 6               | -3.162549000 | -1.602299000 | 0.215892000  |
| 6               | -3.250765000 | -3.881681000 | -0.581677000 |
| 1               | -2.872107000 | -4.673979000 | -1.208401000 |
| 6               | -4.269012000 | -1.849279000 | 1.030983000  |
| 6               | -4.330671000 | -4.124337000 | 0.252301000  |
| 1               | -4.775774000 | -5.109395000 | 0.269796000  |
| 6               | -4.850279000 | -3.112261000 | 1.040730000  |
| 1               | -5.709881000 | -3.295668000 | 1.671179000  |
| 6               | -4.850948000 | -0.730686000 | 1.853476000  |
| 1               | -5.696324000 | -1.101968000 | 2.446019000  |
| 1               | -4.095894000 | -0.367568000 | 2.557140000  |
| 7               | -5.200276000 | 0.387906000  | 0.990449000  |
| 1               | -5.939587000 | 0.120244000  | 0.352957000  |
| 34              | -2.377206000 | 0.157184000  | 0.259931000  |
| 1               | -4.650968000 | 1.942494000  | 2.252649000  |
| 1               | -6.346152000 | 1.465151000  | 2.444247000  |
| 6               | -5.537259000 | 1.600365000  | 1.715218000  |
| 1               | -5.815711000 | 2.383373000  | 1.013910000  |
| 16              | -0.227844000 | -0.283768000 | 0.466759000  |
| 8               | 3.375175000  | -0.639880000 | -2.005282000 |
| 8               | 1.153763000  | 3.304626000  | -0.754856000 |
| 8               | 6.373148000  | 0.647748000  | 2.108868000  |
| 8               | 7.997174000  | -0.833947000 | 2.472761000  |
| 8               | -1.434791000 | 3.115817000  | 0.928601000  |
| 8               | -3.340883000 | 3.999779000  | 0.159560000  |
| 7               | 2.482775000  | 1.036822000  | -0.796921000 |
| 7               | 7.654200000  | -2.038565000 | 0.096904000  |
| 7               | -0.736913000 | 2.469325000  | -1.666769000 |
| 6               | 5.518329000  | -0.884234000 | -0.136163000 |
| 6               | 4.802693000  | 0.435406000  | -0.397358000 |
| 6               | 1.244415000  | 1.040222000  | -1.537030000 |
| 6               | 6.987039000  | -0.764547000 | 0.286423000  |
| 6               | 3.500282000  | 0.211796000  | -1.143007000 |
| 6               | 0.403442000  | -0.204109000 | -1.244318000 |
| 6               | 0.553583000  | 2.377838000  | -1.254899000 |
| 6               | 7.184287000  | -0.357144000 | 1.733007000  |
| 6               | -1.527872000 | 3.641242000  | -1.380664000 |
| 6               | -2.224197000 | 3.608000000  | -0.030285000 |
| 1               | 5.500298000  | -1.460220000 | -1.061290000 |
| 1               | 4.979006000  | -1.477017000 | 0.604446000  |
| 1               | 4.624860000  | 0.990315000  | 0.520154000  |
| 1               | 5.420641000  | 1.068264000  | -1.042011000 |
| 1               | 1.478089000  | 1.018969000  | -2.608523000 |
| 1               | 7.439335000  | 0.058770000  | -0.290310000 |
| 1               | 2.644762000  | 1.834628000  | -0.200294000 |
| 1               | -0.438939000 | -0.301925000 | -1.924543000 |
| 1               | 1.043249000  | -1.071354000 | -1.396249000 |
| 1               | 8.519831000  | -2.076928000 | 0.619147000  |
| 1               | 7.844171000  | -2.206945000 | -0.880802000 |
| 1               | -1.235510000 | 1.620166000  | -1.879119000 |
| 1               | -2.292279000 | 3.779500000  | -2.139580000 |

|                 |              |              |              |
|-----------------|--------------|--------------|--------------|
| 1               | -0.863113000 | 4.505431000  | -1.382589000 |
| 1               | 6.592564000  | 0.863905000  | 3.024797000  |
| 1               | -1.942940000 | 3.083119000  | 1.749816000  |
| 8               | -1.659228000 | -2.289964000 | -1.451557000 |
| 6               | -1.071671000 | -3.312501000 | -2.227260000 |
| 1               | -0.676706000 | -4.107549000 | -1.592348000 |
| 1               | -1.787111000 | -3.731840000 | -2.937293000 |
| 1               | -0.254588000 | -2.846997000 | -2.771302000 |
| <b>9b RSeSH</b> |              |              |              |
| 6               | 1.684950000  | 0.237221000  | 0.045299000  |
| 6               | 0.301537000  | 0.096352000  | -0.135725000 |
| 6               | 2.256171000  | 1.504708000  | 0.088906000  |
| 1               | 3.319729000  | 1.620917000  | 0.228313000  |
| 6               | -0.493367000 | 1.233110000  | -0.276125000 |
| 6               | 1.455087000  | 2.630190000  | -0.040853000 |
| 1               | 1.906308000  | 3.611689000  | -0.001368000 |
| 6               | 0.091199000  | 2.495947000  | -0.219905000 |
| 1               | -0.535188000 | 3.371692000  | -0.325439000 |
| 6               | -1.978057000 | 1.100002000  | -0.481084000 |
| 1               | -2.410027000 | 2.088272000  | -0.689514000 |
| 1               | -2.164178000 | 0.473255000  | -1.359211000 |
| 7               | -2.600546000 | 0.438833000  | 0.654179000  |
| 1               | -2.442708000 | 0.977892000  | 1.496248000  |
| 34              | -0.509182000 | -1.637176000 | -0.170373000 |
| 1               | -4.129883000 | -0.540226000 | -0.357093000 |
| 1               | -4.593458000 | 1.076345000  | 0.196591000  |
| 6               | -4.014406000 | 0.179470000  | 0.454761000  |
| 1               | -4.438043000 | -0.260372000 | 1.355393000  |
| 1               | 0.689930000  | -2.290715000 | -0.708270000 |
| 8               | 2.405878000  | -0.904741000 | 0.163291000  |
| 6               | 3.796259000  | -0.798265000 | 0.366564000  |
| 1               | 4.282323000  | -0.299355000 | -0.474519000 |
| 1               | 4.020071000  | -0.256565000 | 1.287892000  |
| 1               | 4.167900000  | -1.815152000 | 0.447044000  |

## Notes and references

- [1] K. S. Jensen, R. E. Hansen and J. R. Winther, *Antioxidants & redox signaling*, 2009, **11**, 1047–1058.
- [2] K. Khazim, D. Giustarini, R. Rossi, D. Verkaik, J. E. Cornell, S. E. Cunningham, M. Mohammad, K. Trochta, C. Lorenzo, F. Folli *et al.*, *Translational Research*, 2013, **162**, 16–25.
- [3] F. Q. Schafer and G. R. Buettner, *Free radical biology and medicine*, 2001, **30**, 1191–1212.
- [4] W. G. Kirlin, J. Cai, S. A. Thompson, D. Diaz, T. J. Kavanagh and D. P. Jones, *Free Radical Biology and Medicine*, 1999, **27**, 1208–1218.
- [5] A. V. Marenich, J. Ho, M. L. Coote, C. J. Cramer and D. G. Truhlar, *Physical Chemistry Chemical Physics*, 2014, **16**, 15068–15106.
- [6] M.-H. Baik and R. A. Friesner, *The Journal of Physical Chemistry A*, 2002, **106**, 7407–7412.
- [7] H. Bauer, K. Fritz-Wolf, A. Winzer, S. Kühner, S. Little, V. Yardley, H. Vezin, B. Palfey, R. H. Schirmer and E. Davioud-Charvet, *Journal of the American Chemical Society*, 2006, **128**, 10784–10794.
- [8] J. Eberhardt, D. Santos-Martins, A. F. Tillack and S. Forli, *Journal of chemical information and modeling*, 2021, **61**, 3891–3898.
